# Supplementary material
Source: PubMed Central journal article supplement (PMC10267683)
Supplement: EMBJ-42-e112675-s001.pdf [file EMBJ-42-e112675-s001.pdf]

## TABLE OF CONTENTS

### Appendix Figures and Figure legends

Appendix Figure S1. p300 is localized in both the cytosol and nucleus.....2

Appendix Figure S2. GDH1 acetylation at both K503 and K527 increased resistance of CRC cell to hypoxia.....3

### Appendix Tables and Table legends

Appendix Table S1. siRNA sequence used in this study. Related to Methods.....5

Appendix Table S2. RT-qPCR primer sequences used in this study. Related to Methods.....17

## Appendix Figures and Figure legends

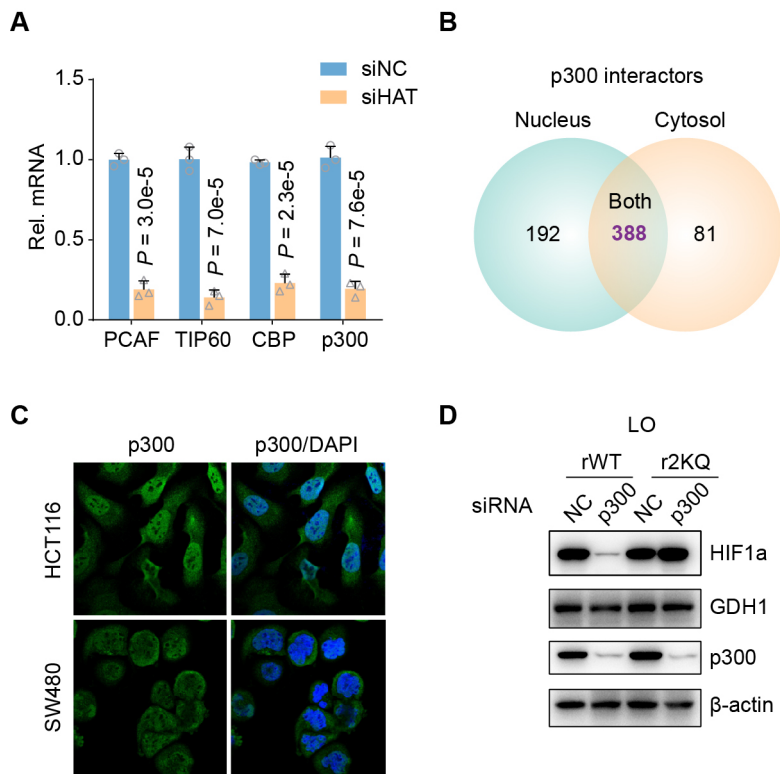

### Appendix Figure S1. p300 is localized in both the cytosol and nucleus.

(A) The knockdown efficiency of siRNA targeting PCAF, TIP60, CBP and p300 in HCT116 cells was analyzed by qRT-PCR. Data represent the mean  $\pm$  SD (unpaired two-tailed student's t-test, n=3).

(B) The cellular localization of the interactors of p300 from Biogrid database.

(C) Immunofluorescence of p300 in HCT116 and SW480 cells was performed to analyze p300 localization. DAPI indicates nuclei location.

(D) Immunoblot of HIF1 $\alpha$  protein level in the NC or siP300 groups when overexpressing WT- or 2KQ-GDH1.

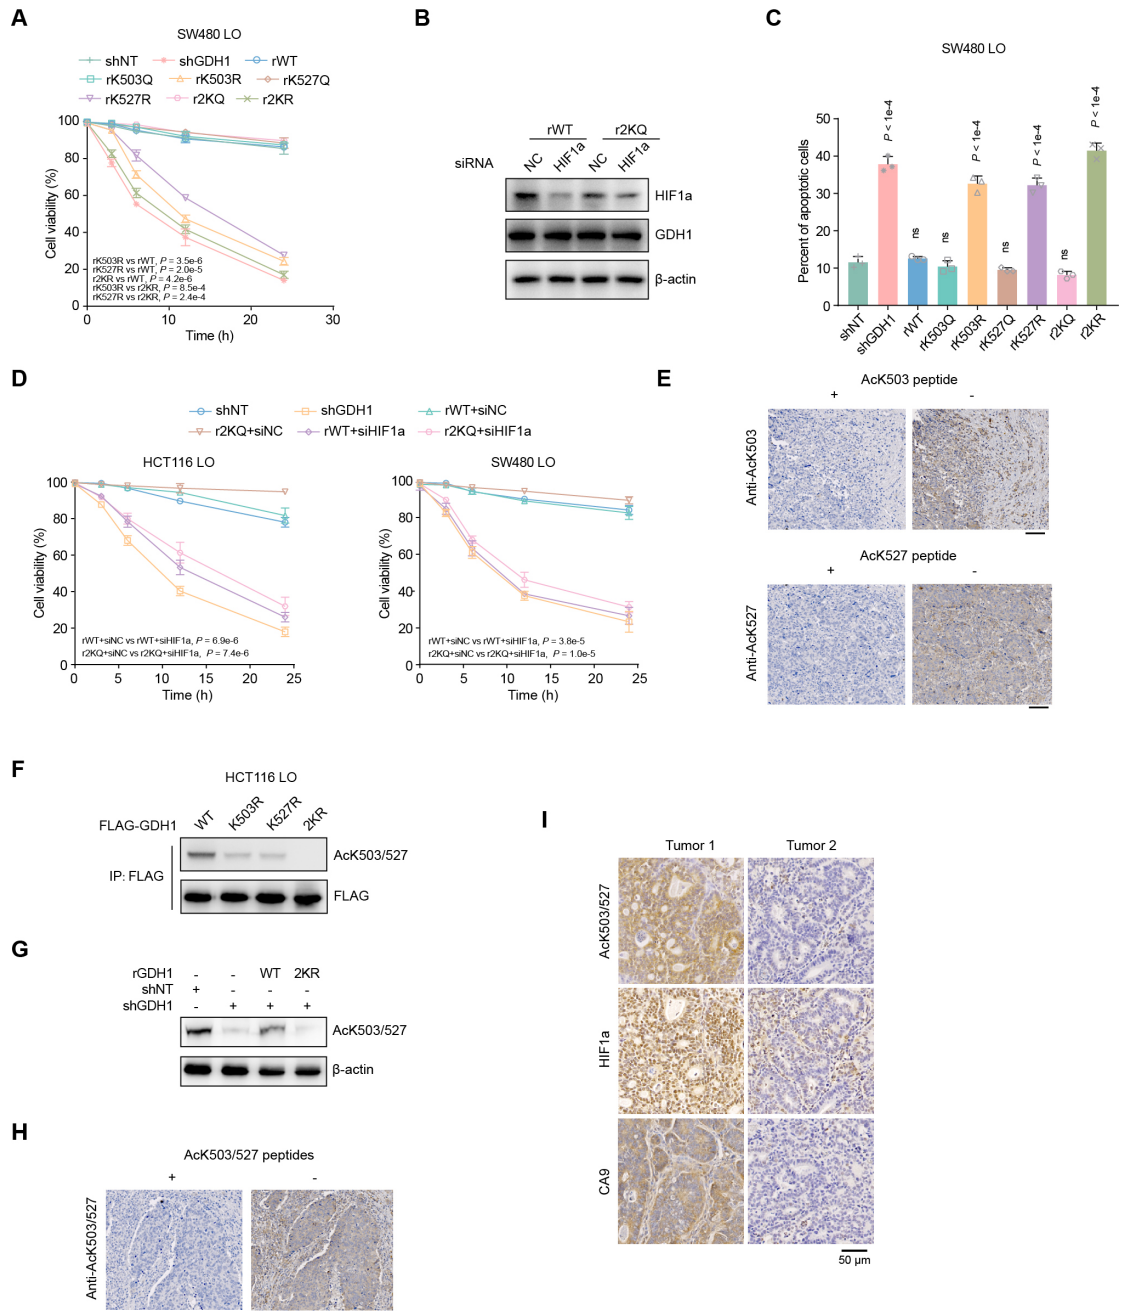

**Appendix Figure S2. GDH1 acetylation at both K503 and K527 increased resistance of CRC cell to hypoxia**

(A) Cell viability percent of indicated cell lines under hypoxia was analyzed by trypan blue and PI/Annexin V double staining, respectively. Mean  $\pm$  SD, two-way ANOVA with Tukey's HSD post hoc test,  $n=3$ .

(B) Immunoblot of HIF1 $\alpha$  protein level in the NC or siHIF1 $\alpha$  groups when overexpressing WT- or 2KQ-GDH1.

(C) Cell apoptotic percent of indicated cell lines under hypoxia was analyzed by trypan blue and

PI/Annexin V double staining, respectively. Mean  $\pm$  SD, one-way ANOVA with Tukey's HSD post hoc test, n=3.

(D) Cell viability of indicated cell lines under hypoxia was analyzed by trypan blue and PI/Annexin V double staining, respectively. Mean  $\pm$  SD, two-way ANOVA with Tukey's HSD post hoc test.

(E) Validation of the specificity of antibodies against AcK503 and AcK507 in IHC. IHC analyses of human CRC tissues were performed with the indicated antibodies in the presence (+) or absence (-) of specific blocking peptides.

(F-G) Western blot analysis of the specificity of antibody against GDH1-AcK503/527.

(H) Validation of the specificity of antibody against AcK503/527 in IHC. IHC analyses of human CRC tissues were performed with the indicated antibodies in the presence (+) or absence (-) of specific blocking peptides.

(I) The representative images were shown after antibodies against GDH1-AcK503/527 and HIF1 $\alpha$  were stained in the tumor tissues from AOM/DSS CRC samples.

## Appendix Tables and Table legends

Appendix Table S1. siRNA sequence used in this study. Related to Methods.

| Human Gene                                        | siRNA sequences (5'-3', sense) | siRNA sequences (5'-3', anti-sense) |
|---------------------------------------------------|--------------------------------|-------------------------------------|
| <b>siRNA sequences against 163 dehydrogenases</b> |                                |                                     |
| AASDH-1                                           | UUA AUGCUGCUUCUGAAUUAU         | AUAAUUCAGAAGCAGCAUUA                |
| AASDH-2                                           | UGUGCAGUUACAUGGUUAUAAU         | AUUUAACCAUGUAAACUGCACA              |
| AASDH-3                                           | GGUCACCUGCAGUGGAAAUUU          | AAUUUCCACUGCAGGUGACC                |
| AASDHPPT-1                                        | CGUCUGAUGAUAAAGAAAUUA          | UAAUUUCCUUAUCAUCAGACG               |
| AASDHPPT-2                                        | GCAAGUUGGAAUUGAUUAUAAU         | AUUUAUCAAUUCCAACUUGC                |
| AASDHPPT-3                                        | GAUAUAGGCCAAGUUUAUAAA          | UUUAUAAACUUGGCCUAUAUC               |
| ACAD10-1                                          | UAUCCCUUCUGGAACUAUAUU          | AAUAUAGUCCAGAAGGGUAU                |
| ACAD10-2                                          | UGCAGUCUUGAGCAAUAAUUU          | AAAUUAUUGCUC AAGACUGCA              |
| ACAD10-3                                          | UUGGAUAUAGCCAUGAUUAAA          | UUUAAUCAUGGCCUAUAUCCAA              |
| ACAD11-1                                          | GUCGAAUCUUCGUGAUUUUA           | UUAAAUCACGGAAGAUUCGAC               |
| ACAD11-2                                          | GAUAUCUUCUGGGAAAUAUUU          | AAUUUUUCCCAGAAGAUUUC                |
| ACAD11-3                                          | AGACUGACAGCCAAGAUUAAA          | UUUAUUCUUGGCUGUCAGUCU               |
| ACAD8-1                                           | CCGAGAGAUGGCCUCCAAAUAU         | AUAUUUGGAGCCAUCUCUCGG               |
| ACAD8-2                                           | ACCAGCACACAGCCUAUAUA           | UAUAUAGGCUGUGGUGCUGGU               |
| ACAD8-3                                           | GAGGAACAGAGGCACAAAUUU          | AAUUUUGUGCCUCUGUCCUC                |
| ACAD9-1                                           | AUGGAGGACUGGCCAAUUAUU          | AAUAUUGGCCAGUCCUCCAU                |
| ACAD9-2                                           | GGGAAACCCGAAGAUAAAUA           | UAAUUUAUCUUCGGGUUCCC                |
| ACAD9-3                                           | GGAUUGAUUCAGGAGAAAUUU          | AAUUUUCUCCUGAAUCAUCC                |
| ACADL-1                                           | GGACUGCUUGGUGUCAAUUU           | AAUAUUGACACCAAGCAGUCC               |
| ACADL-2                                           | CAGACAGUGCAACAUAUUUA           | UAAUUUAUGUUGCACUGUCUG               |
| ACADL-3                                           | UGGUGGUACAAAUGAAAUAU           | AUUUUUCAUUUGUACCACCA                |
| ACADM-1                                           | UCAAGCUACUGCUCGUAAAUU          | AAUUUACGAGCAGUAGCUUGA               |
| ACADM-2                                           | AGAUUGGGAGAAAGGAAUUA           | UUAUUUCCUUUCUCCCAAUCU               |
| ACADM-3                                           | UUGGAGGCAAUGGAUUUAUA           | UAUUAAAUCCAUUGCCUCCAA               |
| ACADS-1                                           | UUGCCGAGAAGGAGUUGUUUC          | GAAACAACUCCUUCUCGGCAA               |
| ACADS-2                                           | GCGACUCAUGGGUUCUGAAUG          | CAUUCAGAACCCAUGAGUCGC               |
| ACADS-3                                           | GCUGCCAUGCUGAAGGAUAAC          | GUUAUCCUUCAGCAUGGCAGC               |
| ACADSB-1                                          | UCAGAAGCUCUACUCAUAUA           | UAUAUUGAGUAGAGCUUCUGA               |
| ACADSB-2                                          | UGAUAAAGAGGGAGAUUAUA           | UAAUAAUCUCCUCUUUAUCA                |
| ACADSB-3                                          | GACUACACUAUCCAUAUAUU           | AAUAUAUGGAAUAGUGUAGUC               |
| ACADVL-1                                          | AGAGCAGACAGUUUCUUA             | UUAAAGAAACUGUGUCUGUCU               |
| ACADVL-2                                          | GCGGUAGAUCAUGCCACUAU           | AUUAGUGGCAUGAUCUACCGC               |
| ACADVL-3                                          | GGUGGAGGCCAAGCUGAUAAA          | UUUAUCAGCUUGGCCUCCACC               |
| ADH1A-1                                           | GGCCAUGAAGUUCGUUAUA            | UUAAUACGAACUUC AUGGGCC              |
| ADH1A-2                                           | GACAUCAACAAGGACAAAUUU          | AAUUUUGUCCUUGUUGAUGUC               |
| ADH1A-3                                           | GCUAUUCUUGGUGGCUUUA            | UUUAAAGCCACCAAGAAUAGC               |
| ADH1B-1                                           | GACAUCAACAAGGACAAAUUU          | AAUUUUGUCCUUGUUGAUGUC               |
| ADH1B-2                                           | UUCCAGAACCCUCUCAAUAAA          | UUUAUUGAGAGGUUCUGGGAA               |

|            |                        |                         |
|------------|------------------------|-------------------------|
| ADH1B-3    | UUUCACUGGAUGCGUAAUAA   | UUAUUAACGCAUCCAGUGAAA   |
| ADH1C-1    | GACAUCAACAAGGACAAAUUU  | AAAUUUGUCCUUGUUGAUGUC   |
| ADH1C-2    | UUCCCAGAACCUCUCAUAAA   | UUUAUUGAGAGGUUCUGGGAA   |
| ADH1C-3    | UUUCACUGGAUGCAUAAUAA   | UUAUUAUUGCAUCCAGUGAAA   |
| ADH4-1     | CAUCUAUUCUCCAGCAAUUAU  | AUAAUUGCUGGAGAAUAGAUG   |
| ADH4-2     | UCUGAGUCCACUCACAAAUUU  | AAAUUUGUGAGUGGACUCAGA   |
| ADH4-3     | AUAAUCGGCCGUACUAAAAU   | AUUUAUAGUACGGCCGAUUUAU  |
| ADH5-1     | CAGUGUGGAGAAUGCAAUUU   | AAAUUUGCAUUCUCCACACUG   |
| ADH5-2     | UGGAGCCACUGAAUGUAUAAA  | UUAUUACAUCUCCAGUGGCCUCA |
| ADH5-3     | CGAACUGUUGUAAAAGAUUUAA | UUAAAUCUUUACAACAGUUCG   |
| ADH6-1     | UAGAGAAAGUAUGCCUAAUUA  | UAAUUAGGCAUACUUUCUCUA   |
| ADH6-2     | CUAAACUGGUUGCUGAUUUAU  | UAUAAUCAGCAACCAGUUUAG   |
| ADH6-3     | CAAUGAAGCAGUUGAAUUAAU  | AUUAAAUCACUCGUUCAUUG    |
| ADH7-1     | UUUGCAUUAGGAGCGAUUUA   | UAAUAUCGCUCCUAAUGCAA    |
| ADH7-2     | GACCUCAACAAAGACAAAUUU  | AAAUUUGUCUUUGUUGAGGUC   |
| ADH7-3     | GAGUCCUGGCAAAGAAAUUU   | AAAUUUCUUUGCCAGGAACUC   |
| ADHFE1-1   | UGAGAUGGCUGUUUCAAUUAU  | AUAUUUGAAACAGCCAUCUCA   |
| ADHFE1-2   | GGUUUAGUGAAGAUGUAUAAA  | UUUAUACAUCUUCACUAAACC   |
| ADHFE1-3   | GCUUCAUGAAACUGUAUAAA   | UUAAUACAGUUUCAUUGAAGC   |
| ALDH16A1-1 | GGCAGCCAGGAUGGCAUUUAA  | UUAAAUGCCAUCUCCUGGCUGCC |
| ALDH16A1-2 | UGGGAGCCCAUGGGAGUAAUU  | AAUUACUCCCAUGGGCUCCCA   |
| ALDH16A1-3 | GUCCAGGCCAUGUGGUAAUUUC | GAAAUACCACAUGGCCUGGAC   |
| ALDH18A1-1 | CUGAGCAGAGAGCAGAAAUUA  | UAAUUUCUGCUCUCUGCUCAG   |
| ALDH18A1-2 | UCUGCUCAGGACACCAUUUAU  | AAUAAUGGUGUCCUGAGCAGA   |
| ALDH18A1-3 | CUCAGAGCAUGGAAGUUUAAA  | UUUAAACUCCAUGCUCUGAG    |
| ALDH1A-11  | UCAGUGAGUGGCAAGAAAUUU  | AAAUUUCUUGCCACUCACUGA   |
| ALDH1A1-2  | CUCCACGUGGCAUCUUUAAUA  | UAUUAAAGAUGCCACGUGGAG   |
| ALDH1A1-3  | CAGCAAUCAUGAAGUUUAAA   | UUUAAACUUCAUGAUUUGCUG   |
| ALDH1A2-1  | AGUACACCAAGAUCUUUAAA   | UUUAUAAAGAUCUUGGUGUACU  |
| ALDH1A2-2  | UGGCAAUACAGUAGUUUAAA   | UUAAUAACUACUGUAUUGCCA   |
| ALDH1A2-3  | UUGGCCUGUUCAGGAAAUUU   | AAAUUUCUGAACAGGGCCAA    |
| ALDH1A3-1  | UCAAGUUCACCAAGAUUUUA   | UAAAUAUCUUGGUGAACUUGA   |
| ALDH1A3-2  | CUUCAACUCGGGAGCAAUUAU  | AUAUUUGCUCUCCGAGUUGAAG  |
| ALDH1A3-3  | GCUCCAUUUGGUGGCUUUAAA  | UUUAAAGCCACCAAUUGGAGC   |
| ALDH1B1-1  | CACGCCAUUUGGAGGGUUUAA  | UUAAACCCUCCAAAUGGCGUG   |
| ALDH1B1-2  | ACCAGCUGUUCAUCAACAAUG  | CAUUGUUGAUGAACAGCUGGU   |
| ALDH1B1-3  | AGCACGUGGAUGUUGACAAAG  | CUUUGUCAACAUCACGUGCU    |
| ALDH1L1-1  | AUGCUGCUGGUGAAGAAUUAU  | AAUAUUCUUCACCAGCAGCAU   |
| ALDH1L1-2  | GUUUGCAGAGCUGACAUUAAA  | UUUAAUGUCAGCUCUGCAAAC   |
| ALDH1L1-3  | GACCCUCAUUCACGGAGAUAA  | UUAUCUCCGUGAAUGAGGGUC   |
| ALDH1L2-1  | GUUCAUCCCAUGGAUUAUAAU  | AUUUAUCCAUGGGAAUGAAC    |
| ALDH1L2-2  | GGAGAACCACUGGAAAUAAA   | UUUAAUUUCCAGUGGUUCUCC   |
| ALDH1L2-3  | CGGUGUCUGUGCCAUAUUAU   | AUAAUAAUGGCACAGACACCG   |

|           |                        |                       |
|-----------|------------------------|-----------------------|
| ALDH2-1   | CUCAAAUGUCUCCGGUAUUUAU | AUAAUACCGGAGACAUUUGAG |
| ALDH2-2   | AGGUCUUCUGCAACCAGAUUU  | AAAUCUGGUUGCAGAAGACCU |
| ALDH2-3   | GAUUUGGACAAGGCCAAUUAC  | GUAAUUGGCCUUGUCCAAAUC |
| ALDH3A1-1 | CAAGGAUCUGUACCCAGUAAU  | AUUACUGGGUACAGAUCUUG  |
| ALDH3A1-2 | GGGACUAUGGAAGAAUCAUUA  | UAAUGAUUCUCCAUAGUCCC  |
| ALDH3A1-3 | AGCAACGACAAGGUGAUUAAG  | CUUAAUCACCUUGUCGUUGCU |
| ALDH3A2-1 | CAGGAAAUGCUGUGAUUUAUA  | UUAUAAUCACAGCAUUUCCUG |
| ALDH3A2-2 | AUGUAGAUGAGGCCAUAAAUA  | AAUUUAUGGCCUCAUCUACA  |
| ALDH3A2-3 | UCAGCGUCCUGUUUAUUAAA   | UUUAAUAAACAGGGACGCUGA |
| ALDH3B1-1 | UGCUGAAGCCAUCGGAGAUUA  | UAAUCUCCGAUGGCUUCAGCA |
| ALDH3B1-2 | UCGUGUGGGCAAGAUUGUUUA  | AUAACAUCUUGCCCACACGA  |
| ALDH3B1-3 | GCACCAUCACCCGUUUCUAUG  | CAUAGAAACGGGUGAUGGUGC |
| ALDH3B2-1 | CCUCCGGCCUGGAGAAUUUA   | UUAAUUUCUCCAGGCCGGAGG |
| ALDH3B2-2 | GGUGCUGAAGCCGUCAGAAUA  | AUUUCUGACGGCUUCAGCACC |
| ALDH3B2-3 | AUGAGGGCUUCACCUACAUAU  | AUAUGUAGGUGAAGCCCUCAU |
| ALDH4A1-1 | GGUCAUCAAGGAGACACAUA   | UUAUGUGUCUCCUUGAUGACC |
| ALDH4A1-2 | ACAAGAGCCUGCUCACAAAG   | CUUUGUUGAGCAGGCUCUUGU |
| ALDH4A1-3 | AGGAGCACAGUCGGAUCAAAAG | CUUUGAUCCGACUGUGCUCCU |
| ALDH5A1-1 | CUUCGGAAGUGGUACAAUUUA  | UAAAUUGUACCACUUCGGAAG |
| ALDH5A1-2 | GGGCAUGGCAUCUAAAUUUA   | UAAAUUAGAUGCCAUGGCC   |
| ALDH5A1-3 | GGCGUCAACGAAGGAUUAAUA  | AAUUAAUCCUUCGUUGACGCC |
| ALDH6A1-1 | GGGCAGACACUUCAGUAUUUA  | UUAAUACUGAAGUGUCUGCCC |
| ALDH6A1-2 | CCAAAGACAUGGACCUUUUAU  | AAUAAAGGUCCAUGUCUUUGG |
| ALDH6A1-3 | AGCCAUCCAGAUUGUAAAUA   | UUUUUACAAUCUGGAUGGCU  |
| ALDH7A1-1 | GUGGCUGUCACAAAGAUAAUA  | UAUUAUCUUUGUGACAGCCAC |
| ALDH7A1-2 | ACUGCGAGGCGACUGUUUAUA  | UAUAAACAGUCGCCUCGCAGU |
| ALDH7A1-3 | CGAUUCUCUAUGUCUUUAAUA  | AUUUAAAGACAUAGAGAAUCG |
| ALDH8A1-1 | UUACCUUGUAGCUCAUUAUA   | UAUUAUGAGCUACAAGGUAA  |
| ALDH8A1-2 | CCACCAGGUGUGGUCAAUAUA  | AAUAUUGACCACACCUGGUGG |
| ALDH8A1-3 | UUGCUGAAGGUGCCCAAUUUA  | AAUUUUGGGCACCUUCAGCAA |
| ALDH9A1-1 | UUGGAGGCUGCCAGGAUAAUA  | UAUUAUCCUGGCAGCCUCCAA |
| ALDH9A1-2 | GUUAUGUGGUGGAGAUUAUA   | UAUUAUCUCCACCACAUAAC  |
| ALDH9A1-3 | GUGUGACAAUCGAAUAUUUAU  | AAUAAUAUUCGAUUGUCACAC |
| BCKDHA-1  | CUCGCGGAGUUUAUAGAUAA   | UUAUCUAUAAACUCCGCCGAG |
| BCKDHA-2  | GCUCGGUGGAUGAGGUCAAUA  | AAUUGACCUCAUCCACCGAGC |
| BCKDHA-3  | AGGUCAAUACUGGGAUAAAC   | GUUUAUCCAGUAAUUGACCU  |
| BCKDHB-1  | AGAUCCUACUGCAGUAAUAUA  | AAUAUACUGCAGUAGGAUCU  |
| BCKDHB-2  | GUUGGCUUGCGAGACAAAUAU  | AUAUUUGUCUCGCAAGCCAAC |
| BCKDHB-3  | AUUGAUCUGAGGACUAUAAUA  | UAUUAUAGUCCUCAGAUCAAU |
| BCKDK-1   | UGCACGUGCAUGAGCUAUUAUA | UAUUAAGCUCAUGCACGUGCA |
| BCKDK-2   | CUCUCACCAAAGAAGAUUAUA  | AAUAAUCUUCUUUGGUGAGAG |
| BCKDK-3   | GCACGUGCAUGAGCUAUUAUA  | AUAUAUAGCUCAUGCACGUGC |
| BDH1-1    | UGGAGCAAGACGCCACUAUAU  | AAUAGUGGGCGUCUUGCUCCA |

|           |                        |                        |
|-----------|------------------------|------------------------|
| BDH1-2    | CAAGGAGCUGGACAGCCUAAA  | UUUAGGCUGUCCAGCUCCUUG  |
| BDH1-3    | ACUACGGCAAGAAGUACUUUG  | CAAAGUACUUCUUGCCGUAGU  |
| BDH2-1    | GUCAUAGCCACAGACAUUAAU  | AUAAAUGUCUGUGGCUAUGAC  |
| BDH2-2    | AGACUUGAUGUUCUCUUUAAU  | AUAAAAGAGAACAUCAAGUCU  |
| BDH2-3    | UCAGAAAUCUGGCAAUAUUAU  | AUAAUAUUGCCAGAUUUCUGA  |
| CHDH-1    | UGAAGCUCACCAGAGAAAUUU  | AAAUUUCUCUGGUGAGCUUCA  |
| CHDH-2    | CUUGUGAGCAGGGUGCUAUUU  | AAAUAGCACCCUGCUCACAAG  |
| CHDH-3    | AGAGAAGGCAGCUGACAUAU   | AUAAUGUCAGCUGCCUUCUCU  |
| D2HGDH-1  | GCCUGCGGUUUUCUUCGAUAUG | CAUAUCGAAGAAACCGCAGGC  |
| D2HGDH-2  | AUGGUAACCUGCACCUCAAUG  | CAUUGAGGUGCAGGUUACCAU  |
| D2HGDH-3  | GGUGAGAUCUGUCUGCAUUC   | GAAUGCAGACAGGAUCUCACC  |
| DHDH-1    | GGCAGAAGCCAGAGAAGAUUU  | AAAUUCUCUCUGGCUUCUGCC  |
| DHDH-2    | CGAAGGAGUUUGCACAGAAAC  | GUUUCUGUGCAAACUCCUUCG  |
| DHDH-3    | AUCCCGAGCCUCUCCUUAU    | AUAAGGAAGAGGGCUCGGGAU  |
| DHODH-1   | UGAGAGUUCUGGGCCAUAUUU  | AUUUAUGGCCCAAGACUCUCA  |
| DHODH-2   | CAUUAACAGGUAUGGAUUUAA  | UUAAAUCCAUACCUGUUAUG   |
| DHODH-3   | CAAGGCCGAGUCCCAUAAU    | AAUUAUGGGAACUCGGCCUUG  |
| DHRS1-1   | CGUGUGCCCAAGUGGAUUAAU  | AAUAAUCCACUUGGGCACACG  |
| DHRS11-1  | UACAGAUGUGACCUAUCAAU   | AUUUGAUAGGUCACAUCUGUA  |
| DHRS11-2  | UGGACGAUGGGCACAUCAUUA  | UAAUGAUGUGCCCAUCGUCCA  |
| DHRS11-3  | AGGUGUGGUGGAGACACAAU   | AAUUGUGUCUCCACCACACCU  |
| DHRS1-2   | CAAAGCAGGCGCCACAGUUUA  | UAAACUGUGGGCGCCUGCUUUG |
| DHRS12-1  | CCAAGCAAAUCUGGAAAUUU   | AAAUUCCAGAUUUGCUUGGG   |
| DHRS12-2  | CUCCAUGUUCUGAUCAAUAAU  | AUUAUUGAUCAGAACAUGGAG  |
| DHRS12-3  | GCAGGUUGCAUGGUCAAUAAA  | UUUAUUGACCAUGCAACCUGC  |
| DHRS1-3   | CCAGGAAGCCUGCAGUAUAUG  | CAUAUACUGCAGGCUUCCUGG  |
| DHRS13-1  | CCCUCAGAGCUCACCAGAUUU  | AAAUUCUGGUGAGCUCUGAGGG |
| DHRS13-2  | UGGACAUCCUCAUCCACAAUG  | CAUUGUGGAUGAGGAUGUCCA  |
| DHRS13-3  | AGCUGGCUAAUGUACUGUUUG  | CAAACAGUACAUAUAGCCAGCU |
| DHRS2-1   | CUCUCCAUAUGCAGCUUAUAA  | UUUAUAGCUGCAAUGGAAGAG  |
| DHRS2-2   | CUGCGUGGUUCCAGGAAUUU   | AUAAUUCUGGAACCACGCAG   |
| DHRS2-3   | AUCAUCAGCUGCAGAGGAUUG  | CAAUCCUCUGCAGCUGAUGAU  |
| DHRS3-1   | UCCUCUACAGAUGAUCUAUC   | GAUAGAUAUCUGUAGAGGGA   |
| DHRS3-2   | GUAUGCUGGAGCUGCAGAAUG  | CAUUCUGCAGCUCAGCAUAC   |
| DHRS3-3   | ACUUUCAAAAGGGCGGACAUA  | CUAUGUCCGCCCUUUGAAAGU  |
| DHRS4-1   | GACAAGACUCUGGACAUAUU   | AUAAAUGUCCAGAGUCUUGUC  |
| DHRS4-2   | CCUUUCUUUGGAAGCAUAAUG  | CAUUAUGCUUCCAAAGAAAGG  |
| DHRS4-3   | CUGCCUAGCACCUGGACUUU   | AUAAGUCCAGGUGCUAGGCAG  |
| DHRS4L2-1 | GACAAGACUCUGGACAUAUU   | AUAAAUGUCCAGAGUCUUGUC  |
| DHRS4L2-2 | AGUCCUUACAUAUGUCAGUAAA | UUUACUGACAUAUGUAAGGACU |
| DHRS4L2-3 | ACUGCCUGCACCUGGACUUU   | AUAAGUCCAGGUGCAGGCAGU  |
| DHRS7-1   | UGCCUAGAGAAUGGCAAUUU   | UAAAUUGCCAUAUCUCUAGGCA |
| DHRS7-2   | UGCCACAUAACCCAGGUAUAUU | AUUAUACCUGGGUAUGUGGCA  |



|          |                        |                        |
|----------|------------------------|------------------------|
| DHRS7-3  | GGAUGCAGACUCUUCUUAUUU  | AAAUAAGAAGAGUCUGCAUCC  |
| DHRS7B-1 | CGAGAUGGAACAGUAUGAAAU  | AUUUCAUACUGUCCAUCUCG   |
| DHRS7B-2 | CACACCAACCUCUCUGUAAA   | AUUUACAGAGAGGUUGGUGUG  |
| DHRS7B-3 | UGCCUUCUUGGCUGUUUAUC   | GAUAAACAGCCAAGGAAGGCA  |
| DHRS7C-1 | CAAAUCGUGUUAGUGAAUAAU  | AUUAUUCACUAACACGAUUUG  |
| DHRS7C-2 | CAGCGGCCUCCUCUUAUUUA   | UAAAUGAAGAGGAGGCCGUG   |
| DHRS7C-3 | GGAAGAAGCAAGAGGUGUUUA  | UAAACACCUCUUGCUUCUCC   |
| DHRS9-1  | AUCAGGAUCAACAGCUUAAA   | UUUAAAGCUGUUGAUCCUGAU  |
| DHRS9-2  | AGCUCAAGGGAGAGUUUAUAA  | UUAAUAACUCUCCUUGAGCU   |
| DHRS9-3  | ACAAACUGAAAGGCAAUAAA   | AUUUAUUGCCUUCAGUUUGU   |
| DHRSX-1  | UGUUAUCAUAGCUGGAAUAA   | UUUUUCCAGCUAUGAUACA    |
| DHRSX-2  | GAGACUUGGCAUGCAUGUUUAU | AUACAUGCAUGCCAAGUCUC   |
| DHRSX-3  | AGAUGGAUUCGAAGAACAUUU  | AAAUGUUCUUCGAAUCCAUCU  |
| DHTKD1-1 | CCAGGUUGGUGACAGUAUAAU  | AAUAUACUGUCACCAACCUGG  |
| DHTKD1-2 | AUAGAGGGAGGCUGAAUUUAU  | AUAAAUUCAGCCUCCUCUAU   |
| DHTKD1-3 | GGAGGAGGUGUCUGAAUAAA   | UUUAUUUCAGACACCUCUCC   |
| DLD-1    | GGUAUGUUGCUGCUAUUAAA   | UUUAAUAGCAGCAACAUAUCC  |
| DLD-2    | UCCGAAGUUCGCUUGAAUUUA  | UAAAUUCAAGCGAACUUCGGA  |
| DLD-3    | UACAGGUGCUUUUUCUUUAAA  | UUUAAAGAUAAAGCACCUGUA  |
| DMGDH-1  | AGAGCAGAAACAGUGAUAAUU  | AAUUAUCACUGUUUCUGCUCU  |
| DMGDH-2  | GACCUGGAAGGAUCAUAUUUAU | AUAAUAUGAUCCUCCAGGUC   |
| DMGDH-3  | GGAAGCUGGACUGGAAUAAUU  | AAUAUUCAGUCCAGCUUCC    |
| DPYD-1   | CCUGAUAGAACUGCUUAAU    | AUAAAAGCAGUUCUUAUCAGG  |
| DPYD-2   | GUGUAGGUGGAUGCAAUUUAU  | AUAAAUUGCAUCCACCUACAC  |
| DPYD-3   | GGUUUGCCAGAACCCAAUAAA  | UUUAUUGGGUUCUGGCAAACC  |
| EHHADH-1 | UGUGGAGCAGAGGGCAAUUU   | AAAUUUGCCCUCUGCUCACA   |
| EHHADH-2 | CGCUGAAAGGAAAGCAAUAA   | UUUUUUGCUUCCUUUCAGCG   |
| EHHADH-3 | UCCUUGAACGCUGCUUAUAAU  | AAUAUAAGCAGCGUUAAGGA   |
| ETFDH-1  | CCAGGGCUUCCAAUGAAUAAU  | AUUAUUCAUUGGAAGCCUGG   |
| ETFDH-2  | UCUAGCCAAGCAACUAUAAU   | UUUAUAGUUGCUUGGCUAGA   |
| ETFDH-3  | AUGACAGUAUACCGUAAAUA   | UAUUUACAGGUAUACUGUCAU  |
| G6PD-1   | AUCAGUCGGAUACACACAUAU  | AUAUGUGUGUAUCCGACUGAU  |
| G6PD-2   | AGAAGGUCAAGGUGUUGAAAU  | AUUUCAACACCUUGACCUUCU  |
| G6PD-3   | GCCUCAACAGCCACAUGAAUG  | CAUUCAUGUGGCUGUUGAGGC  |
| GAPDH-1  | ACUCUGGUAAGUGGUAUUUG   | CAUAUCCACUUUACCAGAGU   |
| GAPDH-2  | GAUUCACCCAUGGCAAUUC    | GAAUUUGCCAUGGGUGGAAUC  |
| GAPDH-3  | CCUGGUAUGACAACGAAUUUG  | CAAUUCGUUGUCAUACCAGG   |
| GAPDHS-1 | CACCAGUCAGGGAGGAAUAA   | UUUUUCCUCCUGACUGGUG    |
| GAPDHS-2 | CUGCAUGGAGAAGGGUGUAA   | UUAACACCCUUCUCCAUGCAG  |
| GAPDHS-3 | ACAAUUUCGUGAAGCUCAUUU  | AAAUGAGCUUCACGAAUUGU   |
| GCDH-1   | CAGACAUGCUCACUGAGAUUA  | UAAUCUCAGUGAGCAUGUCUG  |
| GCDH-2   | UUCUCUGCUGAAGAGGAAUAA  | UUUUUCCUUCUCCAGCAGAGAA |
| GCDH-3   | UCGUCAUGCACCCUAUCUAUG  | CAUAGAUAGGGUGCAUGACGA  |

|            |                        |                        |
|------------|------------------------|------------------------|
| GLUD1-1    | AUAGGGCACUAUGAUUUAAU   | AUUAAUAUCAUAGUGCCCUAU  |
| GLUD1-2    | CCUACACUCUAUGAGAUUUU   | AAAUUUCUCAUAGAGUGUAGG  |
| GLUD1-3    | AGCGUUCUGCCAGGCAAUUA   | UAAUUUGCCUGGCAGAACGCU  |
| GPD1-1     | CCACUGGCAUAUCUCUUAUUA  | UAAUAAGAGAUUGCCAGUGG   |
| GPD1-2     | CGGGUGACCAUGUGGGUAAUU  | AAAUACCCACAUGGUCACCCG  |
| GPD1-3     | GAGAUUCUGUGGAGCCUAAAAG | CUUUAAGGCUCCACAGAUCUC  |
| GPD1L-1    | GUCAAGAAACUUCAGAAAUUU  | AAAUUUCUGAAGUUUCUUGAC  |
| GPD1L-2    | ACUGACAGACAUCAUAAAUA   | UUUUUAUGAUGUCUGUCAGU   |
| GPD1L-3    | ACUUCUGCAGACUCCAAAUUU  | AAAUUUGGAGUCUGCAGAAGU  |
| GPD2-1     | CAGCAGCAGAAGCACUAAAUU  | AAUUUAGUGCUUCUGCUGCUG  |
| GPD2-2     | UCAGUGAGAGUGGCCUUAUUA  | UAAUAAGGCCACUCUCACUGA  |
| GPD2-3     | GCAGACCAGAAAGGCUUUAUU  | AAUAAAGCCUUUCUGGUCUGC  |
| H6PD-1     | GCACCCAGGCAUGUGGAAUAU  | AUAUUCACAUUGCCUGGGUGC  |
| H6PD-2     | ACCUGGCUAAGAAGUACUUAU  | AUAAGUACUUCUAGCCAGGU   |
| H6PD-3     | UCCAUGGCCGGAAGAAUUUC   | GAAAUUCUCCGGCCAUGGAA   |
| HADH-1     | AUUGACACUGCUAUGAAAUA   | UAAUUUCAUAGCAGUGUCAU   |
| HADH-2     | GCCAGCCCAUCCUAAAUA     | UUUUUAAGGAUGGGCUGGGC   |
| HADH-3     | GCCUCGGCCAAGAAGAUAAUC  | GAUUAUCUUCUUGGCCGAGGC  |
| HADHA-1    | UCCGCUCCGAGGUUAUAUAU   | AUAUAUAACCUCGGGAGCGGA  |
| HADHA-2    | CUCUGUGAAUCUCAGAAAUUU  | AAAUUUCUGAGAUUCACAGAG  |
| HADHA-3    | GUGGACCGGCUCAAGAAUAU   | AUAUUUCUUGAGCCGGUCCAC  |
| HADHB-1    | ACGUUAGCCAAACCAAUAUA   | UAUAUUGGGUUUGGCUAACGU  |
| HADHB-2    | GGGCCAGCGACUGUCUUUAU   | AUUAAGACAGUCGUCUGGCC   |
| HADHB-3    | UCCUUUGGAGAAGUUUAUA    | UUUUUAACUUCUCCAAAGGA   |
| HIBADH-1   | ACAUGGCUAUCCACUUAUAU   | AUAAUAAGUGGAUAGCCAUGU  |
| HIBADH-2   | GUGAAGAAGGGCUCAUUAUA   | UAAUAAGAGCCCUUCUUCAC   |
| HIBADH-3   | UGGCGUCCUCGCGUAAUA     | UUUUUAGCCGAGGGAAACGCCA |
| HPGD-1     | UUGCACAGCAGCCGGUUUAUU  | AAUAAACCGGCUCGUGGCAA   |
| HPGD-2     | CAUUGAAGAUGAUGCUUUA    | UUUAAAGCAUCAUCUCAAUG   |
| HPGD-3     | UGC UUAAAUGGUGCUAUUAU  | AUAAUAGCACC AUUUAAGCA  |
| HSD11B1-1  | CCUCCAUCAGAAAGGAAUAUU  | AAUAUCCUUUCUGAUGGAGG   |
| HSD11B1-2  | CGCCAAGAAGAAGUGUAUUUAU | AUAAUACACUUCUUCUUGGCG  |
| HSD11B1-3  | CUACUCAACGAGCUAUAUAU   | AUAUUUAAGCUCGUUGAGUAG  |
| HSD11B1L-1 | GCCCUGUUCUUCGCCUAUUUAU | AUAAUAGGCGAAGAACAGGGC  |
| HSD11B1L-2 | GGCCUGUUCUUCGCCUAUUUA  | UAAUAGGCGAAGAACAGGGCC  |
| HSD11B1L-3 | GGCUCAUGCAGGUAAACUUUG  | CAAAGUUUACCUGCAUGAGCC  |
| HSD11B2-1  | UGACCAAACCAGGAGACAUUA  | UAAUGUCUCCUGGUUUGGUCA  |
| HSD11B2-2  | UAGCUGCAUGGAGGUGAAUUU  | AAAUUCACCUCCAUGCAGCUA  |
| HSD11B2-3  | AGCUGCAUGGAGGUGAAUUUC  | GAAAUUCACCUCCAUGCAGCU  |
| HSD17B10-1 | CUAGCAAGACGUACAACUUA   | UUAAGUUGUACGUCUUGCUAG  |
| HSD17B10-2 | UAGCAAGACGUACAACUUA    | UUUAAGUUGUACGUCUUGCUA  |
| HSD17B10-3 | AGCAAGACGUACAACUUAAG   | CUUUAAGUUGUACGUCUUGCU  |
| HSD17B1-1  | AUCCAUCCAGAGCUUCAAG    | CUUUGAAGCUCUGGGAUGGAU  |

|            |                       |                       |
|------------|-----------------------|-----------------------|
| HSD17B11-1 | GCUGCCUUUCAUGACGUUUA  | UAAACGUCAUUGAAAGGCAGC |
| HSD17B11-2 | CCCACAGCAAGCAAGUCUUUC | GAAAGACUUGCUUGCUGUGGG |
| HSD17B11-3 | AGCUGGUUCUCUGGGAUUAAA | UUUAUACCCAGAGAACCAGCU |
| HSD17B1-2  | GCAGCAACCGAGAAGAUUUU  | AAUAUUCUUCUCGGUUGCUGC |
| HSD17B12-1 | GAUGCAGUUAUUGGAUUAUAA | UUUAUACCAAUAACUGCAUC  |
| HSD17B12-2 | ACCAGGUUUCAGUGAAAUAU  | UUUUUACUGGAAACCUGGU   |
| HSD17B12-3 | CUUUGCAUCAGAAGAUUUUA  | UAAAUAUCUUCUGAUGCAAAG |
| HSD17B1-3  | ACCUGCCUUCUUGGAUUUAU  | AAUAAAUCCAAGAAGGCAGGU |
| HSD17B13-1 | UAUUGGUUCUGUGGGAUUUA  | UAAUAACCCACAGAACCAAUA |
| HSD17B13-2 | GUAACAAUCGUGGUGAAUAAU | AUUUAUCACCACGAUUGUUAC |
| HSD17B13-3 | CCAUAUUGUCCAGCAAUUU   | AAAUUUGCUGGAACAAUAUGG |
| HSD17B14-1 | GCUCCCUGGAGCUGUCUUUAU | AUAAAGACAGCUCCAGGGAGC |
| HSD17B14-2 | UCUGAGACCAUCCGCCGAUUU | AAUUCGGCGGAUGGUCUCAGA |
| HSD17B14-3 | AGCUUUGGCCUGGAUGAAAG  | CUUUCAUCCAGGGCCAAAGCU |
| HSD17B2-1  | UGGAGGCUUCCUAACAAAUAU | AUAUUUGUUAGGAAGCCUCCA |
| HSD17B2-2  | UAUUUGCCUAUUGGCAUUAU  | AUAUAUGCCAAUAGGCAAUA  |
| HSD17B2-3  | AGUACUAUGUGGGACAGUAUU | AAUACUGUCCCAUAGUACU   |
| HSD17B3-1  | GACUCAAUGUUGUCCUUAUUA | UAAUAAGGACAACAUUGAGUC |
| HSD17B3-2  | GACAUUCACGAGCAUUAUAAA | UUUAAUAUGCUCGUAGAUGUC |
| HSD17B3-3  | GCCUGCAAGAGGAAUUAUAAA | UUUAUAUCCUCUUGCAGGGC  |
| HSD17B4-1  | GUGAUGAAGACUGGGAUUAAA | UUUAUACCCAGUCUUCAUCAC |
| HSD17B4-2  | UACGGAACUGGAAGCUAUUAU | AUAAUAGCUUCCAGUUCGGUA |
| HSD17B4-3  | UAUAACCAAAGGCGGAAUAU  | AUAUUUCCGCCUUGGUUAUA  |
| HSD17B6-1  | AGCUGGCUGGGAUGCUAUUUU | AAUUUAGCAUCCAGCCAGCU  |
| HSD17B6-2  | GCUGGCUGGGAUGCUAUUUU  | AAUUUAGCAUCCAGCCAGC   |
| HSD17B6-3  | UUCAUCCUCUAUCUUAUUUA  | UAAAUAAGAUAGAGGGAUGAA |
| HSD17B7-1  | UCAGAGAUUAGACUGUAUUA  | UAUAUACAGUCUAAUCUCUGA |
| HSD17B7-2  | CCCUACAGCUCUCCAAAUUA  | AUAUUUGGAAGAGCUGUAGGG |
| HSD17B7-3  | CUCAUCCUCUGAUCAAAUUA  | AUAUUUGAUCAGAGGAUUGAG |
| HSD17B8-1  | AGAAAGUGGUGGACAAGAUUA | UAAUCUUGUCCACCACUUUCU |
| HSD17B8-2  | GGUGGACAAGAUACUGAAAU  | AUUUCAGUAAUCUUGUCCACC |
| HSD17B8-3  | CUGAGGAUGACUGGGACAAAG | CUUUGUCCAGUCAUCCUCAG  |
| HSD3B1-1   | AUUCUUCUUGCUAGUAUAAA  | UUUAUACUAGCAGAAAGGAAU |
| HSD3B1-2   | CUUCCUACUCAGGCCAAUUUA | UAAAUUGGCCUGAGUAGGAAG |
| HSD3B1-3   | CGUAUUCACCUUCUUAUAAA  | UUUAUAGAGAAGGUGAAUACG |
| HSD3B2-1   | UGCGUUAAGACCCACAUUAU  | AUAUAUGUGGGUCUUAACGCA |
| HSD3B2-2   | UUCCUUUCUGCCAGUAUAAA  | AUUUAUACUGGCAGAAAGGAA |
| HSD3B2-3   | CUUCCUACUCAGCCAAUUUA  | UAAAUUGGGCUGAGUAGGAAG |
| HSD3B7-1   | CUACAGGAGCUACGAGGAUUU | AAAUCCUCGUAGCUCCUGUAG |
| HSD3B7-2   | CGGGUCUAUGUGGGCAAUGUU | AACAUUGCCCACAUAGACCCG |
| HSD3B7-3   | UACAGGAGCUACGAGGAUUUC | GAAAUCCUCGUAGCUCCUGUA |
| HSDL1-1    | GCAAGCCGAGGUCUCAAUAU  | UAUAUUGAGACCUCGGCUUGC |
| HSDL1-2    | ACGUUGGCAUCUUGGUAAAUA | UAUUUACCAAGAUGCCAACGU |

|           |                        |                         |
|-----------|------------------------|-------------------------|
| HSDL1-3   | UCUGCUUCUAAGGCUUAUUUA  | UAAAUAAGCCUUAAGAAGCAGA  |
| HSDL2-1   | AGCAAAGGAUGGAGCAAUAU   | AUAUUUGCUCUCCAUCCUUUGCU |
| HSDL2-2   | UUGGAAUGGCAGAAGAAUUUA  | UAAAUUCUUCUGCCAUUCCAA   |
| HSDL2-3   | UCAGGGAAAUUGAAGAUUAAA  | UUUAAUCUUCAAUUUCCUGA    |
| IDH1-1    | GGAUGCUGCAGAAGCUAUAUA  | UUUAUAGCUUCUGCAGCAUCC   |
| IDH1-2    | GACAUUUUCAGGAGAUUAU    | AUAUAUCUCCUGAAAGAUGUC   |
| IDH1-3    | GCAAAGCUUGAUAAACAAUAAA | UUUAUUGUUAUCAAGCUUUGC   |
| IDH2-1    | UGAUGAGAUGACCCGUUAUUA  | AUAAUACGGGUCAUCUCAUCA   |
| IDH2-2    | GGCAUCCAGCUAAAGUAUUU   | AAAUACUUUAGCUGGAUGUCC   |
| IDH2-3    | AUCUUUGACAAGCACUAUAAG  | CUUAUAGUGCUUGUCAAAAGAU  |
| IDH3A-1   | UGUUCAGACAGUAACUUUAAU  | AUAAAAGUUACUGUCUGAACA   |
| IDH3A-2   | GGUCACCCAUCUAUGAAUUUA  | UAAAUUCAUAGAUGGGUGACC   |
| IDH3A-3   | CAGAAAGCUGUAAAGAUUUUA  | UAAUAUCUUUACAGCUUUCUG   |
| IDH3B-1   | AGGCGUAAGUUGGACUUAUUU  | AAAUAAAGUCCAACUUACGCCU  |
| IDH3B-2   | CAGGCAGUGGGCAGGAAUUA   | UAUAUUCUGCCCACUGCCUG    |
| IDH3B-3   | ACCUGAGUGAGGUGCAGAAUA  | UAUUCUGCACCUCACUCAGGU   |
| IDH3G-1   | CGGCAAGAGUAUCGCCAAUAA  | UUAUUGGCGAUACUCUUGCCG   |
| IDH3G-2   | CAUCCAUGGACAAUGAGAAUA  | UAUUCUCAUUGUCCAUGGAUG   |
| IDH3G-3   | UCCAUGGACAAUGAGAAUAUG  | CAUAUUCUCAUUGUCCAUGGA   |
| IMPDH1-1  | GCACCCGUGAGGAUGACAAAU  | AUUUGUCAUCCUCACGGGUGC   |
| IMPDH1-2  | CACCCGUGAGGAUGACAAUA   | UAUUUGUCAUCCUCACGGGUG   |
| IMPDH1-3  | ACCCGUGAGGAUGACAAUAC   | GUUUUUGUCAUCCUCACGGGU   |
| IMPDH2-1  | GUUCGGAAAGUGAAGAAUAU   | AUAUUUCUUCACUUUCCGAAC   |
| IMPDH2-2  | GGGAUCCGGCUAAAGAAUAU   | AUAUUUCUUUAGCCGGAUCCC   |
| IMPDH2-3  | CAGCAGCCAGAACAGAUUAUU  | AAUAUUCUGUUCUGGCUGCUG   |
| IVD-1     | UUCAAGAACCUGCGAGAAUUU  | AAAUUCUCGCAGGUUCUUGAA   |
| IVD-2     | ACAUCCUGGGCCAUGAGAAUA  | UAUUCUCAUGGCCCAGGAUGU   |
| IVD-3     | CUGUGCAGGUGUGAUUCUUUA  | UAAAGAAUCACACCUGCACAG   |
| L2HGDH-1  | UGUCAUACAUAGUGGAAUUUA  | UAAAUUCCACUAUGUAUGACA   |
| L2HGDH-2  | AGUCUCUGAAAGCCAAAUUAU  | AUAAUUUGGCUUUCAGAGACU   |
| L2HGDH-3  | CCACAGAUGUUUUGGAUAUAA  | UUUAUCCAUAACAUCUGUGG    |
| LDHA-1    | UAAAGGAUCAGCUGAUUUUA   | UAUAAAUCAGCUGAUCCUUUA   |
| LDHA-2    | GGGAGAAAGCCGUCUUAUUU   | AAAUUAAGACGGCUUUCUCCC   |
| LDHA-3    | UAAGGGUCUUUACGGAAUAAA  | UUUAUCCGUAAAGACCCUUA    |
| LDHAL6A-1 | UGUGCUAUCAGCAUCUUAUUA  | UAAUAAGAUGCUGAUAGCACA   |
| LDHAL6A-2 | CGAAAUGUAUCCAUCUUUAAA  | UUUAAAGAUGGAUACAUUUCG   |
| LDHAL6A-3 | UAAGGGCCUCUAUGGAAUAAA  | UUUAUCCAUAAGAGGCCCUUA   |
| LDHAL6B-1 | GCGCUAUCAGCAUCUUAUUAA  | UUAAUAAGAUGCUGAUAGCGC   |
| LDHAL6B-2 | GGAGAAACGCGCCUUAUUUA   | UAAAUAAGGCGCGUUUCUCC    |
| LDHAL6B-3 | UCCAGUUUCCACCAUAAUUAA  | UUAAUUAUGGUGGAAACUGGA   |
| LDHB-1    | CUGCAGCAUGGGAGCUUAUUU  | AAAUAAAGCUCCCAUGCUGCAG  |
| LDHB-2    | UUGUGGCAGAUAAAGAUUAU   | AAUAUUCUUUAUCUGCCACAA   |
| LDHB-3    | AGUCCUGAUUGCAUCAUAAU   | AAUAUGAUGCAAUCAGGACU    |

|           |                       |                        |
|-----------|-----------------------|------------------------|
| LDHC-1    | CCAACGUAAUGUGGCUAUAAU | AUUAUAGCCACAUAUACGUUGG |
| LDHC-2    | AGCUGCCAUGGUUGGAUUAUU | AAUAAUCCAACCAUGGCAGCU  |
| LDHC-3    | CACCAUGGUUAAGGGAUUAUA | UAUAAUCCCUUAACCAUGGUG  |
| LDHD-1    | CUUCGGCUUCUGGCCAGAAAU | AUUUCUGGCCAGAAGCCGAAG  |
| LDHD-2    | CAGGUACAGCAAGCUGAAUUG | CAAUUCAGCUUGCUGUACCUG  |
| LDHD-3    | AGACCAAGGAGGAUCUGAAUG | CAUUCAGAUCUCCUUGGUCU   |
| MDH1-1    | UGGUAAGAUCAGCCUAUAAU  | AUUAUAGGCUGAUCUUUACCA  |
| MDH1-2    | AGGGUGCAGCCUAGAUAAAU  | AUUUAUCUAAGGCUGCACCCU  |
| MDH1-3    | UGUUGAAGGUCUCCUAUUAU  | UUAAUAGGGAGACCUUCAACA  |
| MDH2-1    | UCAUUGCCAAUCCGGUAAUUU | AAUUAACCGGAUUGGCAAUGA  |
| MDH2-2    | AGGUUGUGAUGUGGUAGUUAU | AUAACUACCACAUCACAACCU  |
| MDH2-3    | CCGCCUGACCCUCUAUGAUAU | AUAUCAUAGAGGGUCAGGCGG  |
| MTHFD1-1  | CACACCACGCCUGGCAAUAUU | AAUAUUGCCAGGCGUGGUGUG  |
| MTHFD1-2  | UCUGGAUGAGGAGGUAAAUAU | UUUUUACCUCCUCAUCCAGA   |
| MTHFD1-3  | UGUCUGAAGAGGUAGAAUUAU | AUAAUUCUACCUUCUUCAGACA |
| MTHFD1L-1 | CAAGCCGGUUCUUGCAAUUAU | AUAAUUGCAAGAACCGGCUUG  |
| MTHFD1L-2 | AGCAGUGAAGCCGAGAUUAUA | UAUAAUCUCGGCUUCACUGCU  |
| MTHFD1L-3 | AGAAGAGGAAGUGAGUAAAUU | AAUUUACUCACUCCUCUUCU   |
| MTHFD2-1  | GAGGAAGAAUUGUUGAAUUUA | UAAAUUCAACAAUUCUCCUC   |
| MTHFD2-2  | GAUGGCUUUCAUGUAAUUAU  | AUUAAUACAUGAAAGCCAUC   |
| MTHFD2-3  | UCAUUGAUGUGGAAUAAAUA  | UAUUUUAUCCCAUCAUAUGA   |
| MTHFD2L-1 | GACCUCACCUCAGUAUAAUUU | AAUUUAUACUGAGGUGAGGUC  |
| MTHFD2L-2 | CCAAGAGUCAGCGUAUUAUA  | UAAUAUACCGCUGACUCUUGG  |
| MTHFD2L-3 | AUACGCAGCUGGCAGAUUAUA | UAAUAUCUGCCAGCUGCGUAU  |
| NQO1-1    | CGAGUCUGUUCUGGCUUAUAA | UUUAUAGCCAGAACAGACUCG  |
| NQO1-2    | GAGUCUGUUCUGGCUUAUAAA | UUUAUAGCCAGAACAGACUC   |
| NQO1-3    | AGAAACGCCUGGAGAAUUAUU | AAUAUUCUCCAGGCGUUUCU   |
| NSDHL-1   | AUCCUGACAGGCCUCAAUUAU | AUAAUUGAGGCCUGUCAGGAU  |
| NSDHL-2   | AGGAUAUGCUGUCAUUGUAUU | AAUACAUGACAGCAUAUCCU   |
| NSDHL-3   | CCCAGCUCUGAAAGGUGUAAA | UUUACACCUUUCAGAGCUGGG  |
| OGDH-1    | CUGAGUAUGAGGAGGAAUUUU | AAUUUCCUCCUCAUACUCAG   |
| OGDH-2    | CAUCCGGAAAGCCGUAAUUA  | UAAUUACGGCUUCCGGAAUG   |
| OGDH-3    | UGCACCGGCAAAGUGUAUUAU | AUAAUACACUUUGCCGGUGCA  |
| OGDHL-1   | GACCCAGAGGCUGUGAUUAU  | AUAUAUCACAGCCUCUGGGUC  |
| OGDHL-2   | CGGACCAAGACCAGCAAUUG  | CAUUUUGCUGGUCUUGGUCCG  |
| OGDHL-3   | UGAUCACAACCAUUGAUAAAC | GUUUUAUCAAUGGUUGUGAUA  |
| PDHA1-1   | GCUGGUAGCAUCCCGUAAUUU | AAUUUACGGGAUGCUACCAGC  |
| PDHA1-2   | UGAGGUCUGCCUGACUUUAUA | UAUAAAGUCAGGCAGACCUCA  |
| PDHA1-3   | AUGGCAGCUUUGUGGAAAUUA | UAAUUUCCACAAAGCUGCCA   |
| PDHA2-1   | UGACGCUACAUUUGAAAUUA  | UUAAUUUCAAAUGUAGCGUCA  |
| PDHA2-2   | GCUCUGGCCUGUAAAUAUAAA | UUUAUAUUUACAGGCCAGAGC  |
| PDHA2-3   | GUAAGAGGGAUCCUAUAAUUA | UUUAUUUAGGAUCCCUUAC    |
| PDHB-1    | ACAGUUCGUGAUGCUAUAUUU | AUUUAUAGCAUCACGAACUGU  |

|          |                        |                        |
|----------|------------------------|------------------------|
| PDHB-2   | AGGAUGCUAAAGGACUUAUUA  | UAAUAAGUCCUUUAGCAUCCU  |
| PDHB-3   | UGAAUGUGAGGUGAUAAAUAU  | AUAUUUAUCACCUCACAUUCA  |
| PDHX-1   | AGUCCAGCUGCCCACAAUAUU  | AAUAUUGCGGGCAGCUGGACU  |
| PDHX-2   | CUGGUCAAAGAUGACAUUAAA  | UUUAAAUGUCAUCUUUGACCAG |
| PDHX-3   | CCAAAGCAACUGCCAUUUAUU  | AAUAAAUGGCAGUUGCUUUGG  |
| PDK1-1   | GCCUGUCAGACUGGCAAAUAU  | AUAUUUGCCAGUCUGACAGGC  |
| PDK1-2   | UGAGGAUGCUAAAAGCUAUUUA | UAAAUAGCUUUAGCAUCCUCA  |
| PDK1-3   | CGUCUGUGUGAUUUGUAUUAU  | AUAAUACAAAUCACACAGACG  |
| PDK2-1   | AGCUCCUGUGUGACAAGUAUU  | AAUACUUGUCACACAGGAGCU  |
| PDK2-2   | GCUCCUGUGUGACAAGUAUUA  | UAAUACUUGUCACACAGGAGC  |
| PDK2-3   | CUCCUGUGUGACAAGUAUUAC  | GUAAUACUUGUCACACAGGAG  |
| PDK3-1   | UUAUUCUUCUGCCGGAUAAUU  | AAUUAUCCGGCAGAAGAUUAA  |
| PDK3-2   | CUCUUUCCGCAUGCUUAUUAA  | UUAAUAAGCAUGCGGAAAGAG  |
| PDK3-3   | GUACUGAUGCUGUCAUUUAUU  | AAUAAAUGACAGCAUCAGUAC  |
| PDK4-1   | UCCCGACCCAUAUAGUAAAUA  | UAUUUACUAAUUGGGUCGGGA  |
| PDK4-2   | ACCAGCACAUUCUUAUAUUUA  | UAAAUAUAAGAAUGUGCUGGU  |
| PDK4-3   | CUCUGUGAUCAGUAUUAUUUA  | UAAAUAUACUGAUCACAGAG   |
| PDPR-1   | GGAUGCUGAUGGAAGAAUUUA  | UAAAUUCUCCAUCAGCAUCC   |
| PDPR-2   | GCUGAUGGAAGAAUUUAUUAU  | AAUAUAAAUUCUCCAUCAGC   |
| PDPR-3   | CGAGAGUCUCGGGUGAAAUAU  | UAAUUUCACCCGAGACUCUCG  |
| PGD-1    | ACGGAGGAAAUUCUGAAUUAU  | UAUAUUCAGAAUUUCCUCCGU  |
| PGD-2    | AUUGAAAUCACAGCCAUAUUU  | AAUAUUGGCUGUGAUUUCAAU  |
| PGD-3    | UUUGGCUGGACUCUCAAUUAU  | AUAAUUGAGAGUCCAGCCAAA  |
| PHGDH-1  | CCUCCGGGACCAAGAAAUAU   | UAAUUUCUUGGUCCCAGGAAGG |
| PHGDH-2  | UCUGGACCAGCUUUGUUUAAA  | UUUAAACAAAGCUGGUCCAGA  |
| PHGDH-3  | GGUGAAAUGCUGUGGUUUAAA  | UUUAAACCACAGCAUUUCACC  |
| PRODH-1  | GGAUGGCAGUGGCACGAAUUA  | UUAUUCGUGCCACUGCCAUCC  |
| PRODH-2  | UGACGGCUUCAUAGCCAUAUUA | UUAAUGGCUAUGAAGCCGUCA  |
| PRODH2-1 | GACGGCUUCAUAGCCAUAUUA  | CUUAAUGGCUAUGAAGCCGUC  |
| PRODH2-2 | CACCUACCAGGCCUGUCUAAA  | UUUAGACAGGCCUGGUAGGUG  |
| PRODH2-3 | GCCGGCUAUGUAGUGUAUAAG  | CUUAUACACUACAUAGCCGGC  |
| PRODH-3  | UUCUCCGAGCAUCCGUCUAUG  | CAUAGACGGAUGCUCGGAGAA  |
| RDH10-1  | GUCUCAGUCCUGGUCAAUAUU  | AUUAUUGACCAGGACUGAGAC  |
| RDH10-2  | CCUACGAUGCUGGAGAUUAAU  | AUUAUUCUCCAGCAUCGUAGG  |
| RDH10-3  | UGGGAAUGGUGAGGAAGAAU   | AUUUCUCCUCACCAUUCCCA   |
| RDH11-1  | CUGCCCUUCCUUCUGUAUAUG  | CAUAUACAGAAGGAAGGGCAG  |
| RDH11-2  | CUGUCUGAUACUAAGUCUAUU  | AAUAGACUUAAGUAUCAGACAG |
| RDH11-3  | UAACCUGCAGGGCGAGAAUU   | AAUUUCUCGCCUCGAGGUUA   |
| RDH12-1  | CGAGGAGCCCGAGUCUAUAUU  | AAUAUAGACUCGGGCUCCUCG  |
| RDH12-2  | CCUUCUUCUCGUUCCUGUAUA  | UAUACAGGAACGAGAAGAAGG  |
| RDH12-3  | GGUGGAGUGUGUAGAACAAAU  | AUUUGUUCUACACACUCCACC  |
| RDH13-1  | GGAGCGAGUGGACAUUCUAAU  | AUUAGAAUGUCCACUCGCUCC  |
| RDH13-2  | ACUGGCAGACGAGGAAGUAUA  | UAUACUCCUCGUCUGCCAGU   |

|           |                        |                       |
|-----------|------------------------|-----------------------|
| RDH13-3   | UGGCAGACGAGGAAGUAUAAC  | GUUAUACUUCCUCGUCUGCCA |
| RDH14-1   | ACAGUGAACAAAGCUAUAUA   | UAUUUAGCUUUGUUCACUGU  |
| RDH14-2   | GGUGCCAGACUUCUUAUUU    | AUAAAUGGAAGUCUGGGCACC |
| RDH14-3   | UGCCAGACUUCUUAUUUU     | AAAUAUUUGGAAGUCUGGGCA |
| RDH16-1   | GCUGAGCCACCUGAGAGAUAA  | UUAUCUCUCAGGUGGCUCAGC |
| RDH16-2   | CAGUAAGGAGAGAUUCUAAA   | UUUAAGAAUCUCUCCUACUG  |
| RDH16-3   | UAAGAAUCAGCUGAACAAAU   | AUUUGUUCAGCUGAUUUCUUA |
| RDH5-1    | GGCUACUGUGUCUCCAAAUUU  | AAAUUUGGAGACACAGUAGCC |
| RDH5-2    | GAGGCGGAUGUAGCUCAUUU   | AAAUGAGCUACAUCCCGCCUC |
| RDH5-3    | GCUACUGUGUCUCCAAAUUUG  | CAAUUUUGGAGACACAGUAGC |
| RDH8-1    | GUGGACGUGCUGGUGAAUAU   | AUUUUCACCAGCACGUCCAC  |
| RDH8-2    | UGGACGUGCUGGUGAAUAUUG  | CAUUUUCACCAGCACGUCCA  |
| RDH8-3    | CUGCCAUGCAGAAUGUCUUUG  | CAAAGACAUUCUGCAUGGCAG |
| SARDH-1   | UCGUGUGUGGACGGAUGAUUU  | AAAUCAUCCGUCCACACACGA |
| SARDH-2   | CCGAGAAGAGUGUGCCAUAUC  | GAUAUGGCACACUCUUCUCGG |
| SARDH-3   | AGGAGGUGUCAGACAAGUUUG  | CAAACUUGUCUGACACCUCCU |
| SDHA-1    | CUUUCUGAGGCAGGGUUUAU   | AUUAAACCCUGCCUCAGAAAG |
| SDHA-2    | UCGCUAUUGCACACCUUAUAU  | AUAUAAGGUGUGCAAUAGCGA |
| SDHA-3    | AGAUAAAGUCCUCCAAUUA    | UUAAUUGGAGGGACUUUAUCU |
| SDHAF1-1  | GAGGCAGGUUCUGAGCCUGUA  | UACAGGCUCAGAACCUGCCUC |
| SDHAF1-2  | UCUGAGCCUGUACCGCGAUCU  | AGAUCGCGGUACAGGCUCAGA |
| SDHAF1-3  | CUGCGCAUCGAGUACCUGUAC  | GUACAGGUACUCGAUGCGCAG |
| SDHAF2-1  | UAGUAAUGACUGGGAUUUUA   | UAAAUUCCAGUCAUUACUA   |
| SDHAF2-2  | CCUCUAUGACCGCCUGAUUAA  | UUAAUCAGGCGGUCAUAGAGG |
| SDHAF2-3  | AGUAAUGACUGGGAUUUUAC   | GUAAAUAUCCAGUCAUUACU  |
| SDHAF3-1  | AGUACGUGAAAGACGAAUUA   | UAAAUUCGUCUUUCACGUACU |
| SDHAF3-2  | AGACGAAUUUAGGAGACAUAA  | UUAUGUCUCCUAAAUUCGUCU |
| SDHAF3-3  | UGACUUUCGUGAUGAACAAAU  | AUUUGUUCACACGAAAGUCA  |
| SDHAF4-1  | GCACCAGAGGAUUCUUAUUUA  | UAAAUUGGAAUCCUCUGGUGC |
| SDHAF4-2  | GAAAGUCUGAACUUGUCAAAAC | GUUUGACAAGUUCAGACUUUC |
| SDHAF4-3  | ACCUACCCGAUAUGGAGAUUG  | CAAUCUCCAUAUCGGGUAGGU |
| SDHB-1    | CUUAUGAAGUUGACCUUAAUA  | UAUUUAGGUCAACUUCUAUAG |
| SDHB-2    | CAUGGUUUGGAUGCUUUUAU   | AUUAAAGCAUCCAAUACCAUG |
| SDHB-3    | CAAUCCAUUGAGCCUUAUUU   | AAUAAGGCUCAUUGGAUUUG  |
| SDHC-1    | CGGUUCUGGAAUAAGAAUUA   | UAUAUUCUUAUCCAGAACCG  |
| SDHC-2    | UGGGAACUUUGAGUCUUAUUU  | AAUAAGACUCAAGUCCCA    |
| SDHC-3    | CCUCAGCUCUGUAUCAGAAAU  | AUUUCUGAUACAGAGCUGAGG |
| SDHD-1    | UCUGCUUCCGGCUGCUUAUUU  | AAUAAGCAGCCGGAAGCAGA  |
| SDHD-2    | AGUGGUCAGACCUGCUCAUAU  | AUAUGAGCAGGUCUGACCACU |
| SDHD-3    | CUUGCUCUGCGAUGGACUAUU  | AAUAGUCCAUCGCAGAGCAAG |
| SDR16C5-1 | AGCACAUUUAUGGACUUAUA   | UUAUAAGUCCAUAUUUGUGCU |
| SDR16C5-2 | GUCUUCUGGAGGCUAUGAUUU  | AAAUCAUAGCCUCCAGAAGAC |
| SDR16C5-3 | AGAACGUUGCUGGUGAAUAG   | CUAUUUCACCAGCAACGUUCU |

|                                                                  |                        |                       |
|------------------------------------------------------------------|------------------------|-----------------------|
| SDR42E1-1                                                        | CCAGAAGGAAUCAAGUUUAUA  | UAUAAACUUGAUUCCUUCUGG |
| SDR42E1-2                                                        | CAAGAAAGAGCUAGGUUAUAA  | UUUAACCUAGCUCUUUCUUG  |
| SDR42E1-3                                                        | GAAGCAGUGGAAUGGUUAAA   | UUUAAACCAUCCACUGCUUC  |
| SDR9C7-1                                                         | CCUCACAGACCUCUCAUUUAU  | AUAAAUGAGAGGUCUGUGAGG |
| SDR9C7-2                                                         | GACUUUGUGAAGGUGAUUAAU  | AUAAAUCACCUUCACAAAGUC |
| SDR9C7-3                                                         | ACAGCUACGGAGAGGAUUUAU  | AAUAAUCCUCUCCGUAGCUGU |
| SORD-1                                                           | GGAGGCCUUUGAAACAUUUAA  | UUAAAUGUUUCAAGGCCUCC  |
| SORD-2                                                           | GUAUGGUCGAAUUGGGAAUUU  | AAAUUCCCAAUUCGACCAUAC |
| SORD-3                                                           | GUCCAAGUCUGUGAAUGUAAA  | UUUACAUUCACAGACUUGGAC |
| TDH-1                                                            | GACCAUCCACGAGUCUUAUUU  | AAUUAAGACUCGUGGAUGGUC |
| TDH-2                                                            | CACAGUGGUCCAUCAUUUUAU  | AUAAAUGAAUGGACCACUGUG |
| TDH-3                                                            | CUGGCGAGAGCAGUGAAUUAU  | UAUAUUCACUGCUCUCGCCAG |
| UGDH-1                                                           | UUCUCCUACACUCCUUAUUUA  | UAAAUAGGAAGUGUAGGAGAA |
| UGDH-2                                                           | AGAAGCUGAUCUUGUAUUUAU  | AUAAAUACAAGAUCAGCUUCU |
| UGDH-3                                                           | GCAGCAGAUCUGAAGUAUUAU  | AAUAUACUUCAGAUCUGCUGC |
| XDH-1                                                            | UGUGGAGGAGAUGGGAAUUAU  | AUUAUCCCAUCUCCUCCACA  |
| XDH-2                                                            | CAGCCUCUCGCCAUCUUUAU   | AAUAAAGAUGGCGAGAGGCUG |
| XDH-3                                                            | GGAUCUCUCUCAGAGUAUUAU  | AUAAUACUCUGAGAGAGAUC  |
| ZADH2-1                                                          | GAUCGUCCUAUCAACUAUAAA  | UUUAUAGUUGAUAGGACGAUC |
| ZADH2-2                                                          | AUAUCCGUGCUGUCAAUUAU   | AUAAUUGACAGCACGGAAUUA |
| ZADH2-3                                                          | UAUCCGUGCUGUCAAUUAUA   | UAUAAUUGACAGCACGGAAUA |
| <b>siRNA sequences against four acetyltransferases and HIF1A</b> |                        |                       |
| PCAF                                                             | GUUGGCUAUAUCAAGGAUUUAU | AUAAUCCUUGAUUAAGCCAAC |
| TIP60                                                            | GGACGUAAGAACAAGAGUUUAU | AUAAUCCUUGUUCUACGUCC  |
| CBP                                                              | AUCGCCACGUCCCUAGUAAC   | GUUACUAAGGGACGUGGCGAU |
| p300                                                             | UAACCAAUGGUGGUGAUUUAU  | UAAUAUCACCACCAUUGGUUA |
| HIF1A                                                            | CCGCUGGAGACACAAUCAUAU  | AUAUGAUUGUGUCUCCAGCGG |



**Appendix Table S2. RT-qPCR primer sequences used in this study. Related to Methods.**

| RT-qPCR primer sequences (5'-3') |                         |                         |
|----------------------------------|-------------------------|-------------------------|
| Homo Target                      | Forward primer          | Reverse primer          |
| PCAF                             | AGGAAAACCTGTGGTTGAAGG   | CAGTCTTCGTTGAGATGGTGC   |
| TIP60                            | AACAAACGTCTGGATGAATGGG  | AGGAAGTCCGTTCTTAGTGGG   |
| CBP                              | CCTGCCACGTCACAGACTG     | GGCCAGAGTTACTATTGAGGAGG |
| p300                             | GCTTCAGACAAGTCTTGGCAT   | ACTACCAGATCGCAGCAATTC   |
| HIF1A                            | ATCCATGTGACCATGAGGAAATG | TCGGCTAGTTAGGGTACACTTC  |
| GLUT1                            | GGCCAAGAGTGTGCTAAAGAA   | ACAGCGTTGATGCCAGACAG    |
| HK1                              | CCAACATTCGTAAGGTCCATTCC | CCTCGGACTCCATGTGAACATT  |
| PGK1                             | GAACAAGGTTAAAGCCGAGCC   | GTGGCAGATTGACTCCTACCA   |
| CCND1                            | TGGAGCCCGTGAAAAAGAGC    | TTCCTTCATCTTAGAGGCCAC   |
| $\beta$ -ACTIN                   | CACCATTGGCAATGAGCGGTTTC | AGGTCTTTGCGGATGTCCACGT  |
| Murine Target                    | Forward primer          | Reverse primer          |
| <i>Tnf<math>\alpha</math></i>    | CCCTCACACTCAGATCATCT    | GCTACGACGTGGGCTACAG     |
| <i>Ifng</i>                      | ATGAACGCTACACACTGCATC   | CCATCCTTTTGCCAGTTCCTC   |
| <i>Il6</i>                       | TAGTCCTTCCTACCCCAATTTTC | TTGGTCCTTAGCCACTCCTTC   |
| <i>Hif1a</i>                     | GATGACGGCGACATGGTTTAC   | CTCACTGGGCCATTTCTGTGT   |
| <i><math>\beta</math>-Actin</i>  | GGCTGTATTCCCCTCCATCG    | CCAGTTGGTAACAATGCCATGT  |
