# Supplementary material
Source: PubMed Central journal article supplement (PMC10267683)
Supplement: EMBJ-42-e112675-s015.pdf [file EMBJ-42-e112675-s015.pdf]

# Expanded View Figures

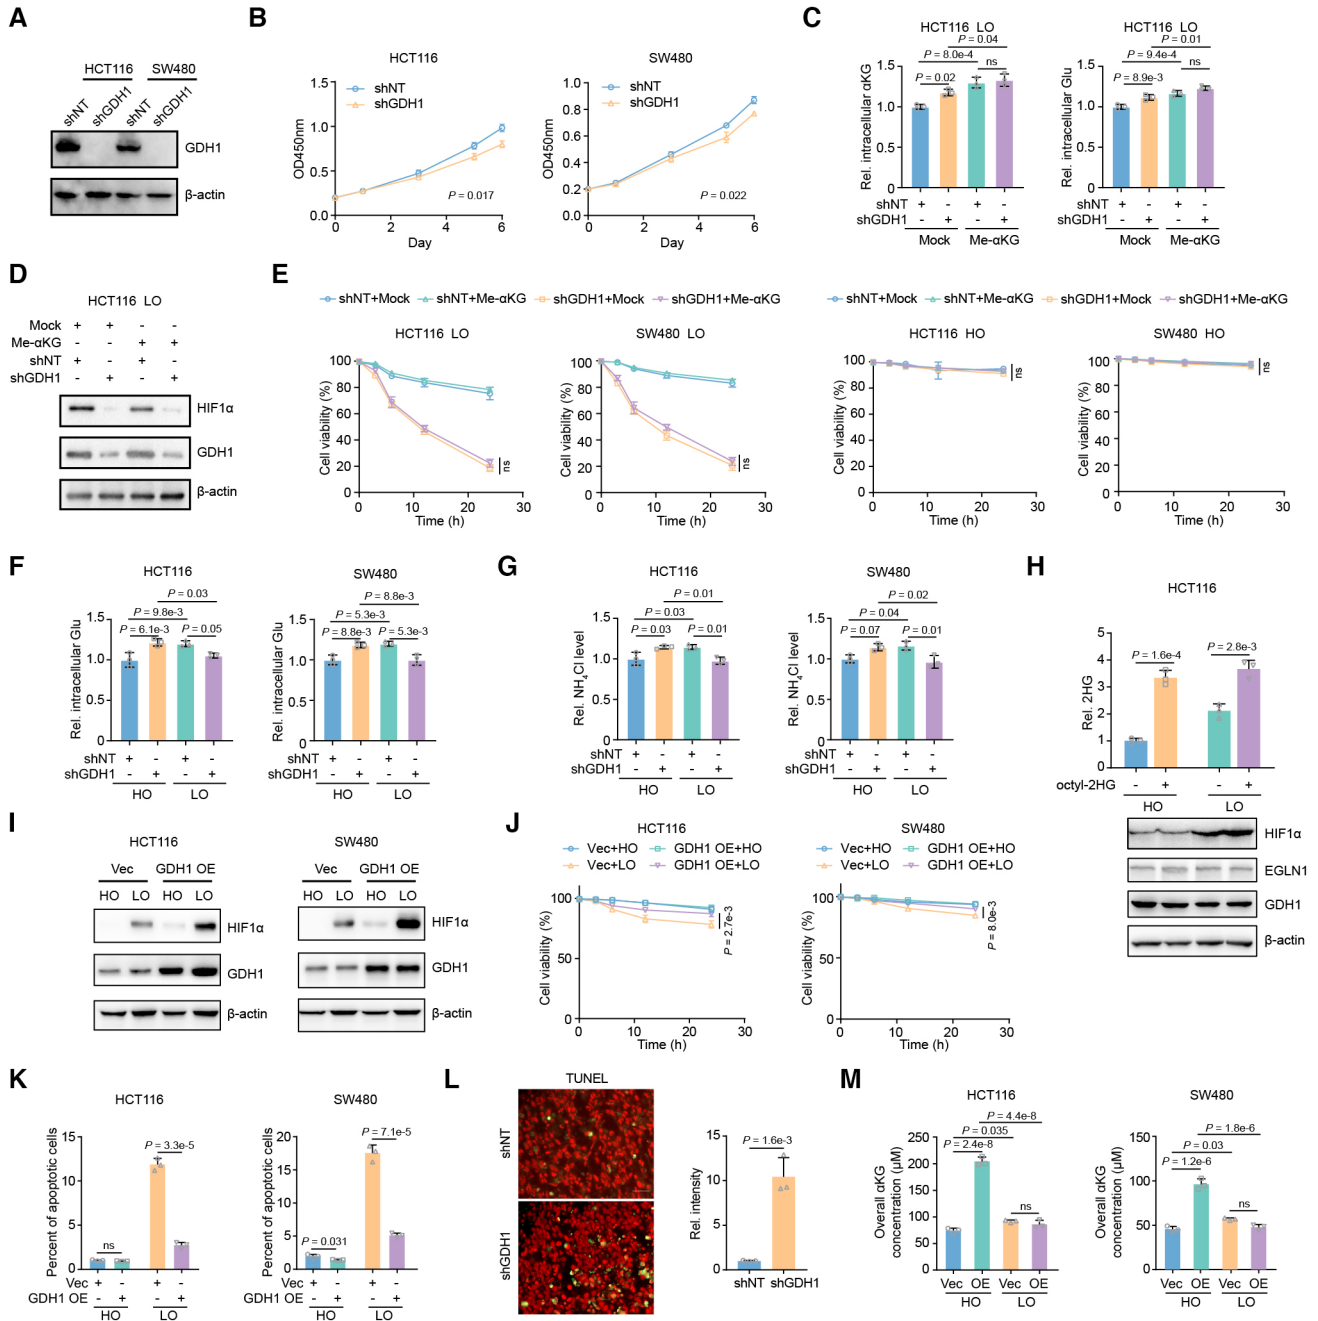

Figure EV1.

**Figure EV1. GDH1 depletion sensitizes CRC cells to hypoxia.**

- A Construction of GDH1 depleted cell lines.  
 B Cell proliferation assay was performed using cell lines constructed in Fig S1A ( $n = 3$ ).  
 C, D HCT116 and SW480 cells with or without GDH1 were supplemented with cell permeable methyl- $\alpha$ KG under hypoxia. Then, the intracellular level of  $\alpha$ KG was tested by  $\alpha$ KG determination kit (C) ( $n = 3$ ). Cells were collected and indicated antibodies were applied to test HIF1 $\alpha$ , EGLN1 and GDH1 proteins (D).  
 E HCT116 and SW480 cells with or without GDH1 were supplemented with cell permeable methyl- $\alpha$ KG under normoxia and hypoxia. Then, cell viability was counted by trypan blue staining ( $n = 3$ ).  
 F, G HCT116 and SW480 cells with or without GDH1 were cultured under normoxia or hypoxia. Cells were collected for determining glutamate (Glu, F) and ammonia ( $\text{NH}_4\text{Cl}$ , G) ( $n = 3$ ).  
 H HCT116 were incubated with or without cell permeable octyl-2HG under normoxia or hypoxia. Indicated antibodies were applied to test HIF1 $\alpha$ , EGLN1 and GDH1 proteins ( $n = 3$ ).  
 I HIF1 $\alpha$  and GDH1 were tested by western blot in HCT116 or SW480 cells with Vec or GDH1 overexpression under normoxia and hypoxia.  
 J HCT116 and SW480 cells with or without GDH1 overexpression were incubated under normoxia and hypoxia, respectively. Then, cell viability was counted by trypan blue staining ( $n = 3$ ).  
 K The apoptotic percent of cells in Fig S1D was counted by PI/Annexin V double staining ( $n = 3$ ).  
 L TUNEL analysis of GDH1 knockdown HCT116 cells under hypoxia. The left was the representative microscopic data, the right was the calculated relative intensity data ( $n = 3$ ).  
 M The overall  $\alpha$ KG level in HCT116 or SW480 cells with or without GDH1 overexpression under normoxia and hypoxia ( $n = 3$ ).

Data information: Data are mean  $\pm$  SD from the biological replicates (B, C, E–H, J–M). Statistics: two-way ANOVA with Tukey's HSD *post hoc* test (B, E, J); one-way ANOVA with Tukey's HSD *post hoc* test (C, F–H, M); unpaired two-tailed Student's *t*-test (K, L). Source data are available online for this figure.

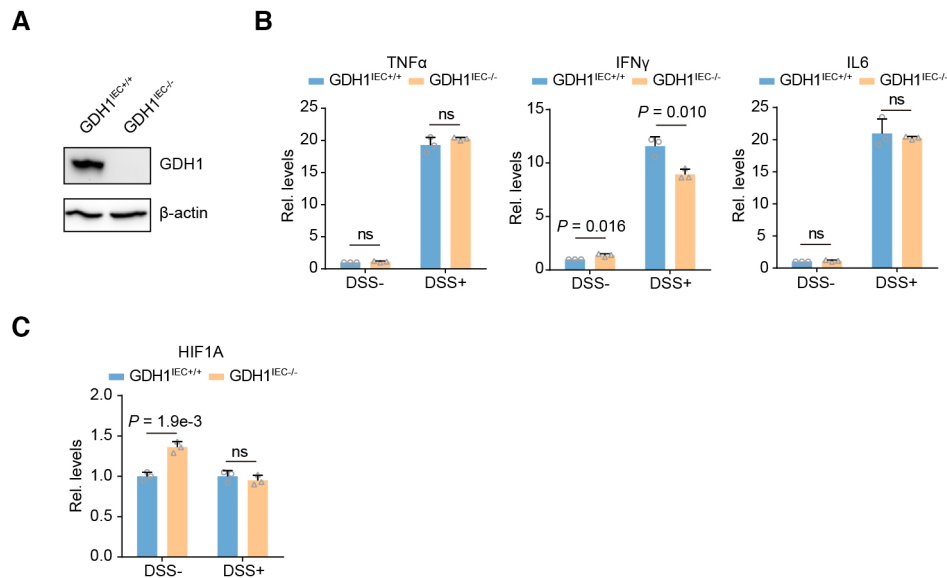**Figure EV2. GDH1 depletion did not significantly affect cytokine and HIF1A expression.**

- A The identification of GDH1 knock out in the intestine by western blot.  
 B qRT-PCR analysis of whole colon homogenates to assess cytokines production after AOM/DSS treatment ( $n = 3$ ).  
 C qRT-PCR analysis of whole colon homogenates to assess HIF1A expression after AOM/DSS treatment ( $n = 3$ ).

Data information: Data are mean  $\pm$  SD from the biological replicates (B, C). Statistics: unpaired two-tailed Student's *t*-test (B, C). Source data are available online for this figure.

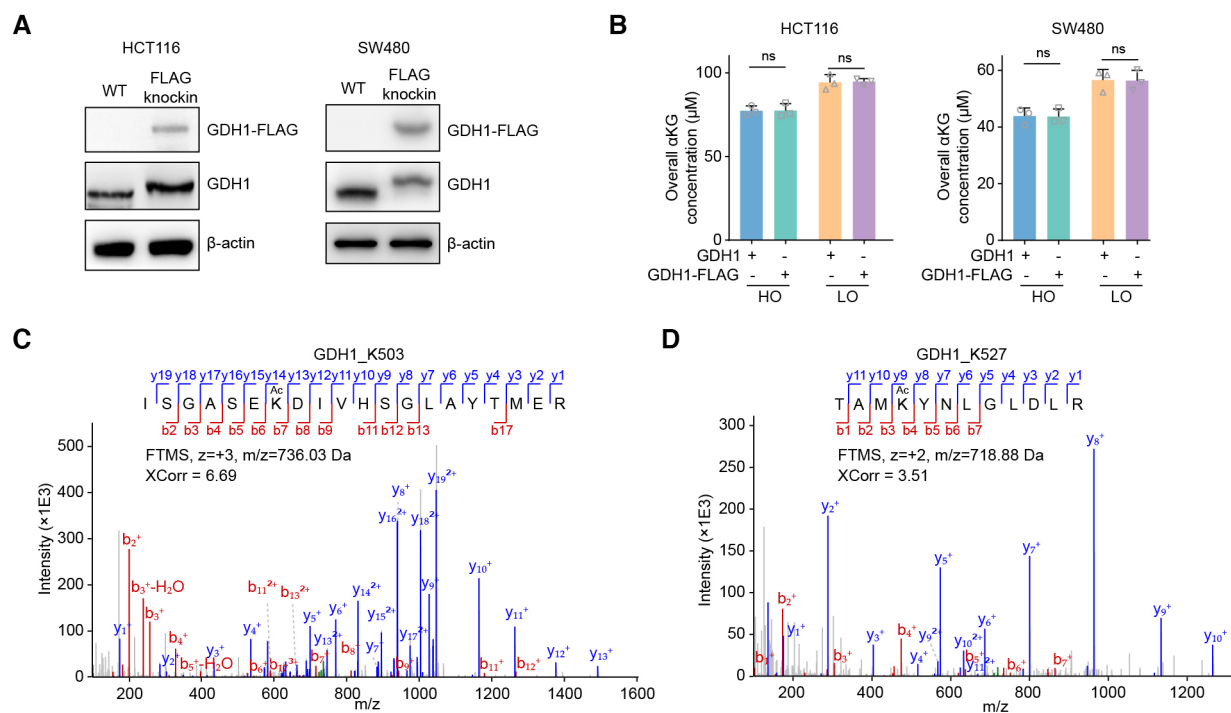

**Figure EV3. The enrichment of GDH1 for acetylation identification.**

- A The successful knockin of FLAG into C terminal of GDH1 in HCT116 or SW480 cells was tested by western blot.  
 B The overall  $\alpha$ KG level in HCT116 or SW480 cells with or without FLAG tagging endogenous GDH1 C terminal under normoxia and hypoxia ( $n = 3$ ).  
 C, D MS/MS spectra identified K503 and K527 acetylation of GDH1 purified from HCT116 cells.

Data information: Data are mean  $\pm$  SD from the biological replicates (B). Statistics: unpaired two-tailed Student's  $t$ -test (B). Source data are available online for this figure.

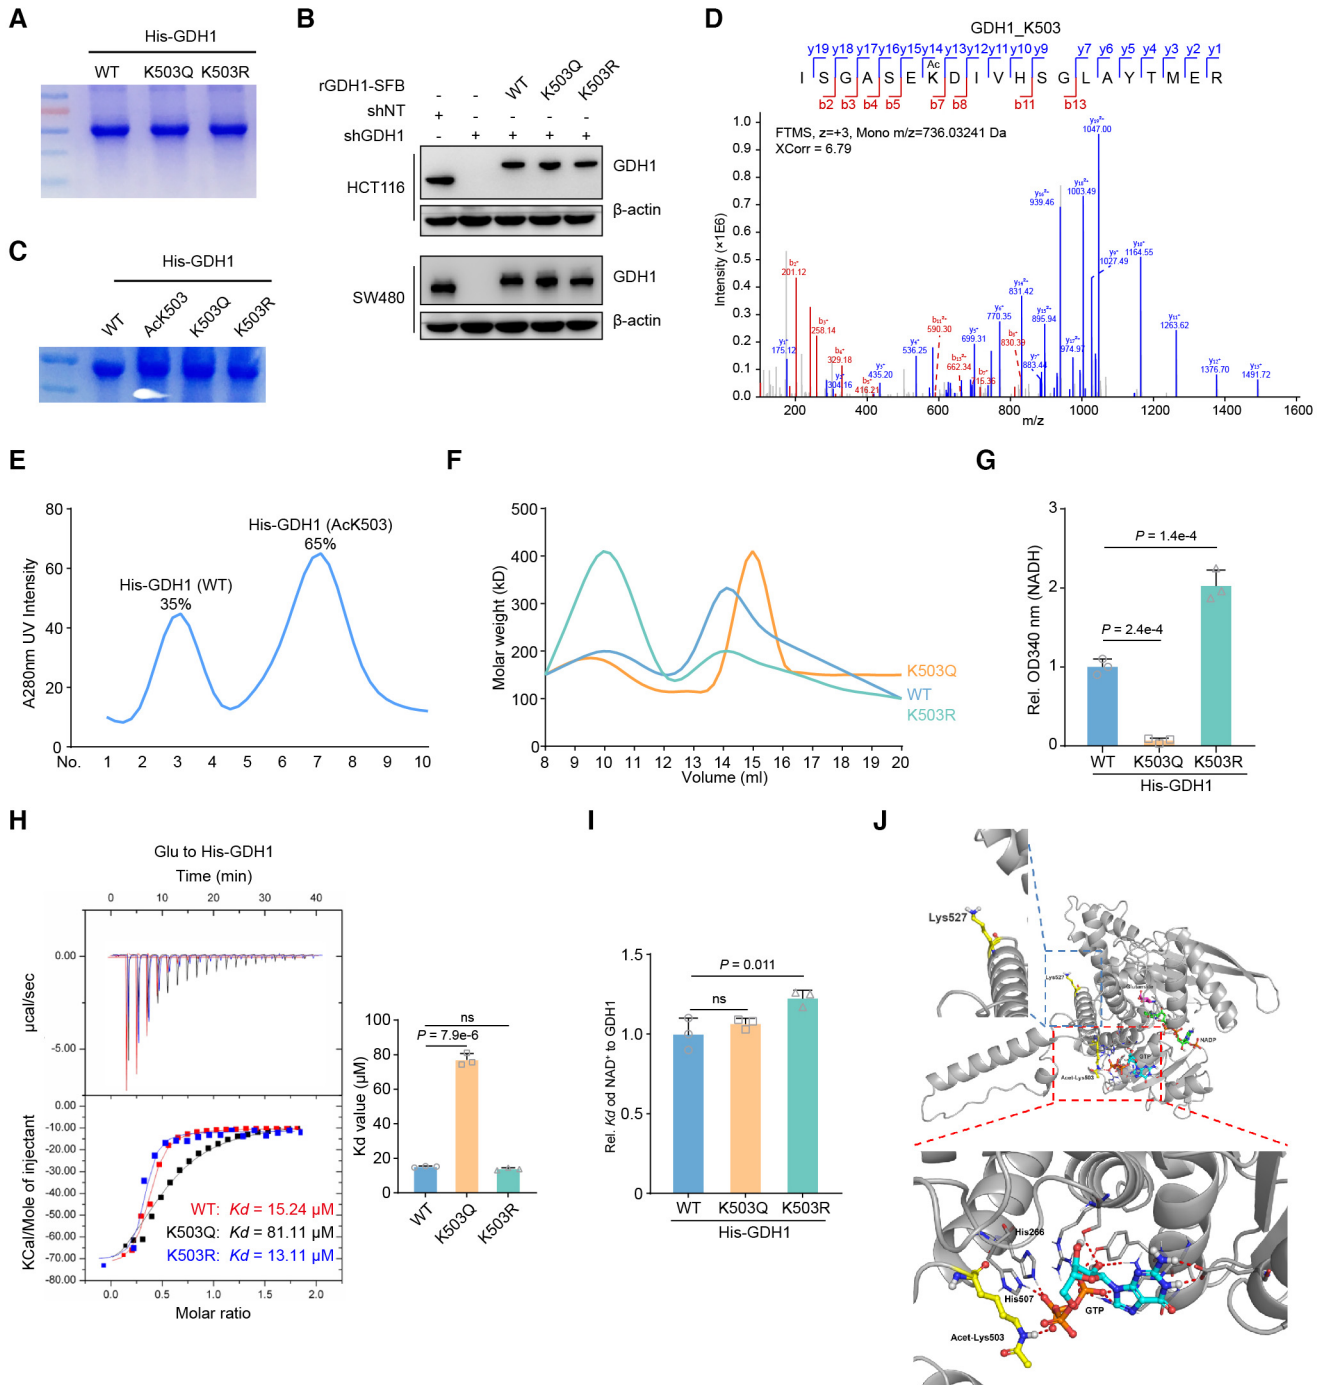

Figure EV4.

**Figure EV4. GDH1-K503 acetylation modulates its enzyme activity.**

- A His-GDH1 (including WT, K503Q and K503R mutants) were purified from *E. coli* and separated by SDS-PAGE. The coomassie blue staining was shown.
- B Construction of GDH1-depleted cell lines, which were rescued with expression of WT GDH1 or K503Q, or K503R mutant GDH1.
- C His-GDH1 (including WT, AcK503, K503Q and K503R mutants) were purified from *E. coli* and separated by SDS-PAGE. The coomassie blue staining was shown.
- D The acetyl modification of AcK503 His-GDH1 from *E. coli* was confirmed by LC-MS/MS.
- E His-GDH1 (including WT and AcK503) purified from *E. coli* were separated and analyzed by FPLC.
- F His-GDH1 (including WT and AcK503) purified from *E. coli* were analyzed by dynamic light scattering.
- G Measure the NADH level by the OD340 absorbance value, respectively ( $n = 3$ ).
- H His-GDH1 proteins (including WT, K503Q or K503R) were purified from *E. coli* to determine Kd value. ITC assays were performed with precipitated His-GDH1 proteins and  $\alpha$ KG ( $n = 3$ ).
- I ITC assays were performed with precipitated His-GDH1 proteins and NAD<sup>+</sup> ( $n = 3$ ).
- J The complex of GDH1 (PDB code: 4ED5) with GTP is superimposed on the GDH1-GTP complex. The protein and metabolites are shown as cartoon and are colored gray and orange or yellow, respectively. Acetyl-K503, K527 and GTP are shown as sticks.

Data information: Data are mean  $\pm$  SD from the biological replicates (G–I). Statistics: one-way ANOVA with Tukey's HSD *post hoc* test (G–I). Source data are available online for this figure.

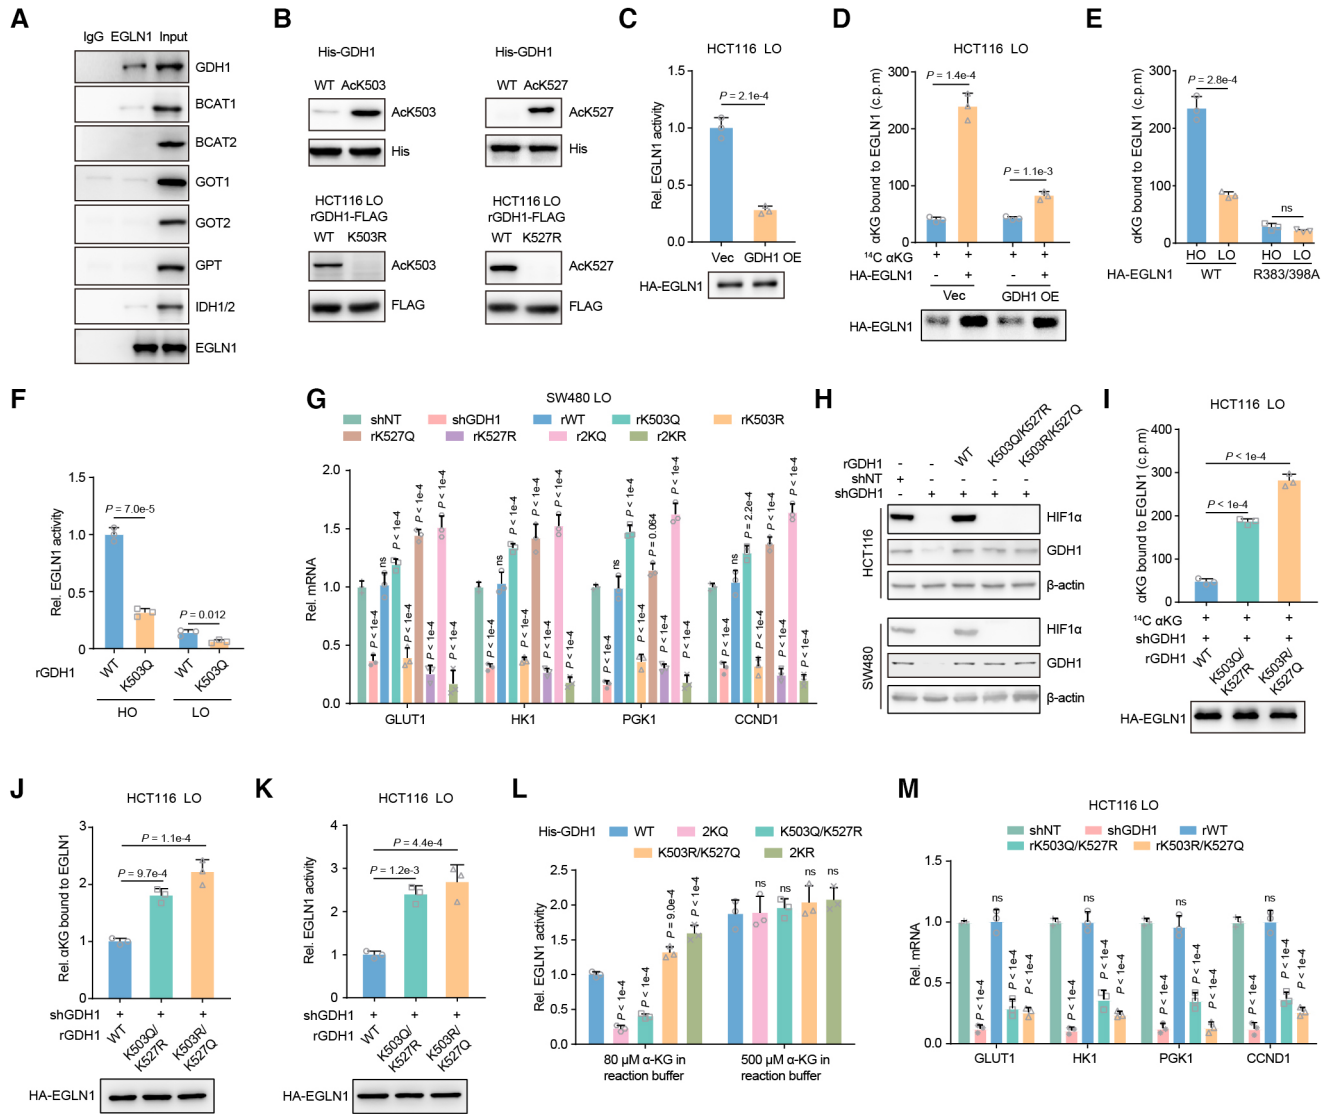

**Figure EV5.**

**Figure EV5. Acetylation modification at both K503 and K527 regulates the survival of CRC cells under hypoxia.**

- A EGLN1 was enriched from hypoxia pretreated HCT116 cells and indicated antibodies were applied to test the association of EGLN1 with  $\alpha$ KG producing or consuming metabolic enzymes.
- B The specificity of antibodies against GDH1-AcK503 or -AcK527 was analyzed by western blot. His- GDH1-AcK503 or -AcK527 was prepared from *E. coli*. Restored expression of GDH1-FLAG (including WT, K503R and K527R) was enriched from HCT116 cells.
- C HA-EGLN1 was enriched from HCT116 cells with or without GDH1 overexpression under hypoxia and then EGLN1 activity was tested by converting  $\alpha$ KG to succinate ( $n = 3$ ).
- D Relative  $\alpha$ KG in EGLN1. HA-EGLN1 was enriched from Vec or GDH1 OE cells under hypoxia. A radiometric  $^{14}\text{C}$ - $\alpha$ KG-EGLN1 binding assay was performed using HA-EGLN1 incubating with  $^{14}\text{C}$ - $\alpha$ KG ( $n = 3$ ).
- E Negative control used for testing relative  $\alpha$ KG in EGLN1. HA-EGLN1 (including WT and R383/398A mutant) was enriched from HCT116 under normoxia and hypoxia. A radiometric  $^{14}\text{C}$ - $\alpha$ KG-EGLN1 binding assay was performed using HA-EGLN1 incubating with  $^{14}\text{C}$ - $\alpha$ KG ( $n = 3$ ).
- F Measure the relative EGLN1 activity affected by restored WT or K503Q GDH1 under normoxia or hypoxia *in vitro* ( $n = 3$ ).
- G The mRNA expression of HIF1 $\alpha$  target genes, GLUT1, HK1, PGK1 and CCND1 was tested in indicated cell lines ( $n = 3$ ).
- H Detection of HIF1 $\alpha$  protein stability in GDH1 depleted cell lines which were rescued with expression of WT GDH1 or K503Q/K527R or K503R/K527Q mutant GDH1.
- I, J Relative  $\alpha$ KG in EGLN1. HA-EGLN1 was enriched from indicated cells under hypoxia. A radiometric  $^{14}\text{C}$ - $\alpha$ KG-EGLN1 binding assay was performed using HA-EGLN1 incubating with  $^{14}\text{C}$ - $\alpha$ KG (H). EGLN1 was digested by trypsin and LC-MS was applied to detect  $\alpha$ KG eluted from EGLN1 (I) ( $n = 3$ ).
- K HA-EGLN1 was enriched from indicated genetic manipulated HCT116 cells under hypoxia and then EGLN1 activity was tested by converting  $\alpha$ KG to succinate ( $n = 3$ ).
- L HA-EGLN1 was enriched from HCT116 cells under hypoxia and then incubated with indicated His-GDH1 in the buffer containing 80 or 500  $\mu\text{M}$   $\alpha$ KG. EGLN1 activity was tested by converting  $\alpha$ KG to succinate ( $n = 3$ ).
- M The mRNA expression of HIF1 $\alpha$  target genes, GLUT1, HK1, PGK1 and CCND1, in indicated cell lines ( $n = 3$ ).

Data information: Data are mean  $\pm$  SD from the biological replicates (C–G, I–M). Statistics: unpaired two-tailed Student's *t*-test (C–F); one-way ANOVA with Tukey's HSD *post hoc* test (G, I–M).

Source data are available online for this figure.
